# Supplementary material for: Overview of Risk Factors for Esophageal Squamous Cell Carcinoma in China
Source: Preprints.org preprint supplement (doi:10.20944/preprints202311.1413.v1), 2023-11-23
Supplement: Supplementary file 1 [file supplementary]

## Sheet: S1. Genetic
Author	Title	# cases/ #controls (* age, sex matched)	Province(s)	Genre of risk factor studied	Specific risk factor studied	Statistical result (95% C. I. ), p-value	Adjusted covariates
Qu et al. (2019)	Single Nucleotide Polymorphisms in MicroRNA-Binding Site of Epidermal Growth Factor Receptor Signaling Pathway and Susceptibility to Esophageal Squamous Cell Carcinoma	494/494 *	Henan	miRNA SNPs	miRNA site rs701848 TT	OR 1.56 (1.07–2.27), p = 0.02	age, sex, drinking, smoking, family history of cancer
					miRNA site rs701848 TT+CT	OR 1.41 (1.01–1.97), p = 0.04	age, sex, drinking, smoking, family history of cancer
Shen et al. (2014)	Variations in the MHC region confer risk to esophageal squamous cell carcinoma on the subjects from high-incidence area in northern China	937/692	NR	SNPs within MHC major histocompatibility complex region of chromosome	HLA-DQA1 6p21.31 rs35399661	OR 1.71 (1.36-2.17), p = 6.07E-06	NR
					TRIM27 6p21.31 rs3763338	OR 0.63 (0.50-0.78), p = 1.62E-05	NR
					DPCR1 6p21.31 rs2844695	OR 0.74 (0.64-0.86),p = 7.60E-05	NR
Wang et al. (2010)	Genome-wide association study of esophageal squamous cell carcinoma in Chinese subjects identifies susceptibility loci at PLCE1 and C20orf54	7673/11013 Han, 303/537 Chinese Uygur/Kazakh (geography, ethnicity matched)	NR	SNP on PLCE1 gene	PLCE1 10q23 rs2274223 [G]	OR 1.43 (1.37-1.49), p (Armitage) = 7.46 E–56	No significant difference when adjusted for age and sex, so final results reported as unadjusted for age and sex
					PLCE1 10q23 rs2274223 [G]	OR 1.53 (1.21-1.95), p (Armitage) = 5.70E-4	" "
				SNP on C20orf54 gene	C20orf54 20p13 rs13042395 [T]	OR 0.86 (0.82-0.90), p (Armitage) = 1.21E-11	" "
					C20orf54 20p13 rs13042395 [T]	OR 0.66 (0.49-0.88), p (Armitage) = 7.88E-3	" "
Wang et al. (2014)	Replication study of ESCC susceptibility genetic polymorphisms locating in the ADH1B-ADH1C-ADH7 cluster identified by GWAS	Hangzhou: 617/537 *	Zhejiang	SNPs of ADH1B-ADH1C-ADH7 cluster	ADH1B rs1042026 G>A	OR 2.02 (1.66–2.47), p < 0.001	age, sex, smoking, drinking
					ADH1B rs17033 A>G	OR 1.58 (1.18–2.11), p = 0.001	age, sex, smoking, drinking
					ADH1C rs1614972 T>C	OR 1.65 (1.36–2.00), p = 0.001	age, sex, smoking, drinking
					ADH1C rs1789903 C>G	OR 1.77 (1.33–2.35), p = 0.001	age, sex, smoking, drinking
					ADH7 rs17028973 C>T	OR 1.61 (1.35–1.92), p = 0.001	age, sex, smoking, drinking
		Jinan: 540 /550 *	Shandong	SNPs of ADH1B-ADH1C-ADH7 cluster	ADH1B rs1042026 AG, AA	OR 1.47(1.12–1.91), p = 0.005; OR 4.53(2.65–7.72), p = 0.001	age, sex, smoking, drinking
					ADH1B rs17033 AG	OR 1.58(1.16–2.16), p = 0.004	age, sex, smoking, drinking
					ADH1C rs1614972 TC, CC	OR 1.30(1.01–1.68), p = 0.045; OR 3.15(1.88–5.26), p < 0.001	age, sex, smoking, drinking
					ADH1C rs1789903 CG, GG	OR 1.58(1.15–2.16), p = 0.005; OR 3.49(0.94–13.02), p = 0.062 (NS)	age, sex, smoking, drinking
					ADH7 rs17028973 CT, TT	OR 1.26(0.97–1.63), p = 0.082 (NS); OR 2.62(1.75–3.93), p < 0.001	age, sex, smoking, drinking
Wei et al. (2007)	Interleukin-18 gene promoter polymorphisms and the risk of esophageal squamous cell carcinoma	235/250 *	Henan	Interleukin-18 (IL-18) gene promoter polymorphisms	IL-18 -137 GC	OR 1.91(1.29-2.82), p = 0.001	age and sex matched
					IL-18 -137 CC	OR 2.95(1.23-7.04), p = 0.012	age and sex matched
					IL-18- 607 CA	OR 1.22 (0.77-1.92), p = 0.393 (NS)	age and sex matched
					IL-18- 607 AA	OR 1.17 (0.70-1.96), p = 0.539 (NS)	age and sex matched
					IL-18 haplotype -137 C/-607 A	OR 1.61(1.16-2.23), p = 0.004	age and sex matched
Wu et al. (2012)	Genome-wide association analyses of esophageal squamous cell carcinoma in Chinese identify multiple susceptibility loci and gene-environment interactions	10123/10664	Beijing, Jiangsu, Henan, Guangdong, Shanxi	SNPs on various genes	HEATR3 chr. 16 rs4785204 T	OR 1.24(1.18–1.29), p(combined) = 2.24E-20	age, sex, smoking, drinking, and "first three principal components from EIGENSTRAT"
					HEATR3 chr. 16 rs7206735 C	OR 1.20 (1.15–1.26) p = 1.97E-16	" "
					HAP1 chr. 17 rs6503659 A	OR 1.27(1.20–1.34), p = 2.73E-16	" "
					XBP1 chr. 22 rs2239815 T	OR 1.18(1.13–1.23), p = 3.88E-15	" "
					ST6GAL1 chr. 3 rs2239612 T	OR 1.21 (1.15–1.27), p = 5.74E-14	" "
					SMG6 chr. 17 rs17761864 A	OR 1.21(1.14–1.28), p = 2.21E-11	" "
					PTPN2 chr. 18 rs2847281 C	OR 1.20 (1.14–1.26), p = 2.49E-11	" "
					CHEK2 chr. 22 rs4822983 T	OR 1.27 (1.21-1.34), p = 1.94E-22	" "
					CHEK2 chr. 22 rs1033667 T	OR 1.25 (1.19-1.30), p = 4.85E-22	" "
				7 SNPs on various chr. 4 genes	ADH1B rs1042026 G>A	OR 1.35 (1.29–1.41), p = 1.78E-39	" "
					ADH1B rs17033	OR 1.41 (1.33–1.50) p = 1.26 E-29	" "
					ADH7 rs17028973,	OR 1.26 (1.21–1.32) p = 2.53E-28	" "
					ADH1C rs1614972	OR 1.28 (1.23–1.34) p = 8.02E-28	" "
					ADH1A rs1229977	OR 1.33 (1.25–1.41) p = 2.75E-20	" "
					ADH1C rs1789903	OR 1.37 (1.28–1.46) p = 9.46E-21	" "
					ADH6 rs1893883	OR 1.34 (1.27–1.42) p = 2.69E-25	" "
				1 SNP on ADH4	chr. 4, ADH4, rs3805322	OR 0.81 (0.78–0.85), p = 2.92E-24	" "
				1 SNP on IGFB2 and alcohol interaction	IGFB2 chr. 2 rs9288520 G>A	OR 1.33 (1.22-1.45), p(combined) = 4.39E-11	" "
				1 SNP on SLC10A2 and alcohol interaction	SLC10A2 chr. 13 rs17450420 A>G	OR 1.70 (1.41-2.06), p(combined) = 4.80E-8	" "
				Carrying 1 SNP on ADH1b and 1 SNP on ALDH2 among drinkers vs. those without both SNPs among drinkers	ADH1B rs10402026 and ALDH2 rs11066015 among drinkers vs. those without risk allelle among drinkers	Fourfold increased risk (data not accessible)	data not accessible
Wu et al. (2008)	Association of matrix metalloproteinases-9 gene polymorphisms with genetic susceptibility to esophageal squamous cell carcinoma	132/132 *	Sichuan	SNP on MMP-9 gene	MMP-9 P574R RR	OR 4.08 (1.58–10.52), p = 0.00	matched age, sex
					MMP-9 P574R PR	OR 1.54 (0.92–2.58), p = 0.10 (NS)	matched age, sex
					MMP-9 R279Q RQ	OR 1.10 (0.68–1.81), p = 0.71 (NS)	matched age, sex
					MMP-9 R279Q QQ	OR 1.70 (0.62–4.66), p = 0.30 (NS)	matched age, sex
					MMP-9 R668Q RQ	OR 1.45 (0.61–1.89), p = 0.16 (NS)	matched age, sex
					MMP-9 R668Q QQ	OR 4.13 (0.83–20.45), p = 0.06 (NS)	matched age, sex
					MMP-9 haplotype 279R-574R	OR 3.52(1.99–6.25), p < .001	matched age, sex
					MMP-9 haplotype 279Q-574P	OR 2.16 (1.07–4.35), p = 0.03	matched age, sex
Xiong et al. (2010)	Polymorphisms of decoy receptor 3 are associated with risk of esophageal squamous cell carcinoma in Chinese Han	444/468 * (also residential area matched)	Chongqing	SNP in DcR3 promoter	DcR3 rs2247440 147 CC	OR 1.98 (1.30-2.96), p < 0.01	age, sex, smoking
					DcR3 rs2247440 147 CT/CC	OR 1.68 (1.25-2.25), p < 0.01	age, sex, smoking
					DcR3 rs2247440 147 CT	OR 1.59 (1.17-2.16), p < 0.01	age, sex, smoking
					DcR3 rs2247440 147 C allele	OR 1.37 (1.14-1.65), p < 0.01	age, sex, smoking
					DcR3 rs297441 -539 G allele	OR 0.71 (0.59-0.87), p < 0.01	age, sex, smoking
					DcR3 rs297441 -539 GA	OR 1.15 (0.73–1.82), p = 0.55 (NS)	age, sex, smoking
					DcR3 rs297441 -539 GG	OR 0.625 (0.39–0.99), p = 0.05 (NS)	age, sex, smoking
					DcR3 rs297441 -539 GA/GG	OR 0.87 (0.56–1.36), p = 0.55 (NS)	age, sex, smoking
Yang et al. (2014)	Insulin-like growth factor binding protein-3 (IGFBP-3) genetic variant and the risk of esophageal squamous cell carcinoma in a Chinese population	500/500 *	Beijing, Hebei , Anhui	SNP in IGFBP-3 insulin-like growth factor binding proteins	IGFBP-3 rs2270628 TT	OR 2.07 (1.05-4.09), p =0.035	sex, age, smoking, drinking
					IGFBP-3 rs2270628 CT	OR 1.25 (0.94-1.66), p = 0.120 (NS)	sex, age, smoking, drinking
Yang et al. (2008)	p53 Codon 72 polymorphism and the risk of esophageal squamous cell carcinoma	435/550*	Henan	Polymorphism in p53	p53 Arg/Arg	OR 6.48 (4.65-9.03)	age, sex, smoking, drinking, hpv status
Yang et al. (2017)	Genetic variability in LMP2 and LMP7 is associated with the risk of esophageal squamous cell carcinoma in the Kazakh population but is not associated with HPV infection	268/500 *	Xinjiang Uygur Autonomous Region- Yili Kazakh Autonomous Region	SNP in LMP2 and LMP7 genes	LMP2 R/C (heterozygous genotype)	OR 1.552 (0.909–2.648), p = 0.013 (NS)	age, sex, smoking, drinking
					LMP2 C/C (homozygous genotype)	OR 1.086 (0.382–3.086), p = 0.011 (NS)	age, sex, smoking, drinking
					LMP7 Q/K	OR 0.433 (0.301–0.643), p < 0.001	age, sex, smoking, drinking
					LMP7 K/K	OR 1.746(0.706–3.986), p = 0.238 (NS)	age, sex, smoking, drinking
					LMP2 or LMP7 and HPV seropositivity	Multiple ORs (NS)	age, sex, smoking, drinking
Cao et al. (2005)	LMP7/TAP2 gene polymorphisms and HPV infection in esophageal carcinoma patients from a high incidence area in China	265/357 *	Henan	Polymorphism inTAP2 or LMP7	TAP2 SNP	OR 2.74 (1.15-6.49), p = 0.023	age, sex, smoking, drinking
					LMP7 SNP	OR 2.19 (1.09-4.37), p = 0.027	age, sex, smoking, drinking
					LMP7/TAP2 haplotype C (homozygous)	OR 2.96 (1.13-7.81), p = 0.027	age, sex, smoking, drinking
					LMP7/TAP2 haplotype C and HPV seropositive	OR 4.33 (2.53-7.42), p < 0.0001	age, sex, smoking, drinking
Ye et al. (2014)	Genetic Variant of Single-Nucleotide Polymorphism Is Associated with Risk of Esophageal Squamous Cell Carcinoma	1000/1391 *	Beijing	SNP	ADHB1 rs1229984 GG	OR 2.81 (2.18–3.62), p = 1.05E-15	age, sex, smoking
				smoking	smoking (independent)	OR 2.17 (1.78–2.64)	age, sex
Yu et al. (2004)	Functional haplotypes in the promoter of matrix metalloproteinase-2 predict risk of the occurrence and metastasis of esophageal cancer	627/777 *	Beijing	Polymorphism in MMP-2 promoter	MMP-2 -1306CC	OR 1.52 (1.17–1.96)	age, sex, smoking, other genotype
					MMP-2-735CC	OR 1.30(1.04–1.63)	age, sex, smoking, other genotype
					MMP-2 T-1306–C-735 haplotype	OR 5.19 (2.14–12.59)	age, sex, smoking, other genotype
					MMP-2 C-1306–T-735 haplotype	OR 6.04 (2.52–14.48)	age, sex, smoking, other genotype
					MMP-2 C-1306–C-735 haplotype	OR 6.53 (2.78-15.33)	age, sex, smoking, other genotype
Yue et al. (2004)	Short tandem repeat polymorphism in a novel esophageal cancer-related gene (ECRG2) implicates susceptibility to esophageal cancer in Chinese population	Beijing:168/231 *	Beijing	STR Short tandem repeat polymorphism	ECRG2 TCA3/TCA3 genotype (vs. carrying TCA4/TCA4) in Beijing population	OR 2.05 (1.02– 4.06)	age, sex
		Linxian: 126/142 *	Henan	STR Short tandem repeat polymorphism	ECRG2 TCA3/TCA3 genotype (vs. carrying TCA4/TCA4) in Linxian population	OR 4.40 (1.93–10.01)	age, sex
Zhang et al. (2014)	Pri-miR-124 rs531564 and pri-miR-34b/c rs4938723 polymorphisms are associated with decreased risk of esophageal squamous cell carcinoma in Chinese populations	1109/1275 *	Zhejiang and Shanghai	miRNA SNPs	pri-miR-124-1 rs531564 GG (vs. CC/CG genotype)	OR 0.61 (0.43–0.86), p = 0.005	age, sex, drinking, smoking
					pri-miR-34b/c rs4938723 CC (vs. TT/TC)	OR 0.82 (0.71–0.95), p = 0.007	age, sex, drinking, smoking
					pri-miR-26-1 rs7372209 G >A, pri-miR-27 rs895819 A >G, pri-miR-218 rs11134527 T>C	Multiple ORs (NS)	age, sex, drinking, smoking
Zhang et al. (2009)	Genetic variants of C1orf10 and risk of esophageal squamous cell carcinoma in a Chinese population	991/984 *	Beijing	SNP in Clorf10 gene (Chromosome 1 open reading frame)	C1orf10 -1139 CC vs. GG genotype	OR 1.34 (1.02–1.76)	age, sex, pack-years
					C1orf10 -1139 GC vs. GG genotype	OR 1.11 (0.90-1.37) (NS)	age, sex, pack-years
Zhang et al. (2014)	Association of single nucleotide polymorphisms in ERCC2 gene and their haplotypes with esophageal squamous cell carcinoma	405/405; age and sex matched	Henan	SNP in ERCC2	ERCC2 rsl3181 AC/CC	OR 1.45 (1.05-2.00), p = 0.02	age, sex, smoking, drinking, family history of cancer
					ERCC2 haplotype G(rs3916874)C(rs238415) G(rs1618536)G(rs1799793)C(rsl3181) Hap5	OR 2.16 (1.27-3.57) p = 2.2E-3	age, sex, smoking, drinking, family history of cancer
					ERCC2 haplotype G(rs3916874)G(rs238415)A(rs1618536)G(rs1799793)C(rsl3181) (Hap7)	OR 3.72 (1.89-6.63), p = 2.0E-6	age, sex, smoking, drinking, family history of cancer
					ERCC2 haplotype G(rs3916874)G(rs238415)G(rs1618536)G(rs1799793)A(rsl3181) (Hap4)	OR 0.47 (0.35-0.71), p = 2.0E-4	Adjusted for age, sex, smoking, drinking and family history of cancer
				SNP in ERCC2 + family history	ERCC2 rs238415, rs1618536, and family history interaction	OR (MDR) 3.23 (2.37–4.40), p < 0.0001	-
Zhang et al. (2012)	Genetic variant in CASP3 affects promoter activity and risk of esophageal squamous cell carcinoma	1026/1270 *	Beijing	SNP in CASP3	CASP3 829 AC	OR 1.53 (1.26–1.89), p < 0.001	age, sex, smoking
					CASP3 829 CC	OR 1.42 (1.11–1.82), p = 0.006	age, sex, smoking
					CASP3 20541 CT	OR 1.15 (0.96–1.37), p = 0.136 (NS)	age, sex, smoking
					CASP3 20541 TT	OR 0.64 (0.39–1.05), p = 0.078 (NS)	age, sex, smoking
Zhu et al. (2016)	Polymorphisms in the AKT1 and AKT2 genes and oesophageal squamous cell carcinoma risk in an Eastern Chinese population	1117/1096 *	Shanghai	AKT1 / AKT2 polymorphisms in AKT signaling pathway	Carrying one variant genotype among these three AKT1 SNPs: rs2494750, rs2494752, or rs10138277	OR 0.60 (0.42-0.87), p = 0.007	age, sex, smoking, drinking, BMI
				AKT1 / AKT2 polymorphisms in AKT signaling pathway, stratified	AKT1 rs2294750 SNP (among women)	OR 0.63 (0.43-0.94) p = 0.024	age, sex, smoking, drinking, BMI
				AKT1 / AKT2 polymorphisms in AKT signaling pathway, stratified	AKT1 rs2294750 SNP (among non-drinkers)	OR 0.79 (0.64-0.99), p = 0.042	age, sex, smoking, drinking, BMI
				AKT1 / AKT2 polymorphisms in AKT signaling pathway, stratified	Carrying one variant genotype among these three AKT1 SNPs: rs2494750, rs2494752, or rs10138277 in women	OR 0.56 (0.37–0.83), p = 0.004	age, sex, smoking, drinking, BMI
				AKT1 / AKT2 polymorphisms in AKT signaling pathway, stratified	Carrying one variant genotype among these three AKT1 SNPs: rs2494750, rs2494752, or rs10138277 in non-drinkers	OR 0.75 (0.60–0.94), p = 0.012	age, sex, smoking, drinking, BMI
				AKT1 / AKT2 polymorphisms in AKT signaling pathway haplotype	AKT1 haplotype C-A-C	OR 0.70 (0.52-0.94), p = 0.019	age, sex, smoking, drinking, BMI
Chang et al. (2015)	Two Novel Variants on 13q22.1 Are Associated with Risk of Esophageal Squamous Cell Carcinoma	4,146/4,135	Beijing, Hebei, Hubei	13q22.1 variant	13q22.1 rs1924966	OR 0.84 (0.80-0.89) p = 1.37E-10	sex, age, smoking status, drinking
					13q22.1 rs115797771	OR 0.69 (0.62-0.78), p = 2.32E-10	sex, age, smoking status, drinking
Chen et al. (2020)	Investigation of IL-4, IL-10, and HVEM polymorphisms with esophageal squamous cell carcinoma: a case–control study involving 1929 participants	721/1208	Fujian, Jiangsu	SNP	IL-4 rs2070874 CC	OR 0.45 (0.24–0.81), p = 0.008	age, sex, smoking, alcohol, BMI
				SNP	IL-4 rs2070874 TT/TC	OR 0.46 (0.25–0.83), p = 0.010	age, sex, smoking, alcohol, BMI
				SNP stratified	IL-4 rs2243263 GC and GC/CC among BMI >=24	OR 1.69 (1.05–12.71), p= 0.030; OR 1.75 (1.10–2.78), p = 0.018	age, sex, BMI, smoking, alcohol
Dai et al. (2014)	Genetic variants at 8q24 are associated with risk of esophageal squamous cell carcinoma in a Chinese population	2139/2273 *	Jiangsu	SNP on PSCA gene	PSCA 8q24 rs2294008 T allele	OR 0.90 (0.81–0.99), p = 0.034	age, sex, smoking, drinking
				SNP on MUC1 gene	MUC1 1q22 rs4072037 G allele	OR 1.08 (0.96–1.22), p = 0.181 (NS)	age, sex, smoking, drinking
				SNP on ZBTB20 gene	ZBTB20 3q13.31 rs9841504 G allele	OR 0.99 (0.88–1.12), p = 0.908 (NS)	age, sex, smoking, drinking
				SNP on PRKAA1 gene	PRKAA1 5p13.1 rs13361707 C allele	OR 0.98 (0.90–1.07), p = 0.666 (NS)	age, sex, smoking, drinking
Du et al. (2015)	U-shaped association between telomere length and esophageal squamous cell carcinoma risk: a case-control study in Chinese population	1045/1433 *	Jiangsu	Relative Telomere Length (RTL)	RTL length: 1st quintile (shortest)	OR 2.40 (1.84– 3.14) p= 1.46E-10	age, sex, smoking, drinking
					2nd quintile	OR1.36 (1.03–1.79) p= 0.027	age, sex, smoking, drinking
					3rd quintile	OR 1.01 (0.76–1.35) p = 0.950 (NS)	age, sex, smoking, drinking
					5th quintile (longest)	OR 1.37 (1.03–1.82) p = 0.030	age, sex, smoking, drinking
Duan et al. (2013)	Novel functional variants locus in PLCE1 and susceptibility to esophageal squamous cell carcinoma: Based on published genome-wide association studies in a central Chinese population	381/420 *	Henan	SNP in PLCE1 gene	PLCE1 rs2274223 GG	OR 2.80 (1.45–5.39), p = 0.02	age, sex, smoking, drinking, family history
				SNP in PLCE1 gene	PLCE1 rs 2274224 CG	OR 0.65 (0.46–0.91), p= 0.01	age, sex, smoking, drinking, family history
				SNP in PLCE1 gene	Combined effect of PLCE1 risk allelles rs17417407T, rs2274223G and rs2274224G	Higher risk increases with dose, p(trend) = 0.005	-
				SNP haplotype	Haplotype Grs17417407Ars2274223Crs2274224	OR 0.76 (0.62–0.93), p = 0.008	age, sex, smoking, drinking, family history
				SNP haplotype	Haplotype Grs17417407Grs2274223Crs2274224	OR 1.75 (1.33– 2.18) p = 2.1E-5	age, sex, smoking, drinking, family history
				SNP haplotype	Haplotype Trs17417407Grs2274223Crs2274224	OR 2.51 (1.15–2.49) p = 0.017	age, sex, smoking, drinking, family history
				Gene-environment interaction	rs2274223, rs2274224, family history, and smoking	OR (MDR) 3.67 (2.74–4.92), p = 0.00	-
Ge et al. (2008)	PTEN polymorphisms and the risk of esophageal carcinoma and gastric cardiac carcinoma in a high incidence region of China	350/634	Hebei	Family history of UGIC	Family hx of UGIC	OR 1.73 (1.29–2.32 )	age, sex, smoking
				SNPs in PTEN	IVS4+/+ genotype	0.64 (0.44–0.94)	age, sex, smoking, family history of UGIC
					IVS4–/+ genotype among positive ESCC family history	0.55 (0.34–0.90)	age, sex, smoking, family history of UGIC
					IVS4+/+ in males	OR 0.61 (0.37–0.98)	age, sex, smoking, family history of UGIC
					IVS4+/+ < 55 years	OR 0.43 (0.21–0.85)	age, sex, smoking, family history of UGIC
					–9C/IVS4– haplotype	OR 1.31 (1.08-1.58), p = 0.029	age, sex, smoking, family history of UGIC
Guan et al. (2014)	Matrix metalloproteinase 1, 3, and 9 polymorphisms and esophageal squamous cell carcinoma risk	132/132	Sichuan	SNPs in Matrix metalloproteinases (MMP)	MMP3 −1612 5A/6A polymorphism	OR 1.93 (1.34–2.77), p < 0.01	Not adjusted
					MMP1 and MMP9 promoter polymorphism	Multiple ORs (NS)	Not adjusted
					2G-5A haplotype	OR 2.04 (1.37–3.04) p < 0.01	Not adjusted
					1G-5A haplotype	OR 3.6 (1.26–10.55) p = 0.01	Not adjusted
Guo et al. (2010)	A functional varient in microRNA-146a is associated with risk of esophageal squamous cell carcinoma in Chinese Han	444/468 * (also residential area matched)	Chongqing	SNPs in MiRNA	pre-miR-146a rs2910164 GG	OR 2.39 (1.36–4.20) p < 0.01	age, sex, smoking
Guo et al. (2007)	Platelet 12-lipoxygenase Arg261Gln polymorphism: Functional characterization and association with risk of esophageal squamous cell carcinoma in combination with COX-2 polymorphisms	1026/1270 *	Beijing	SNP in 12-lipoxygenase (12-LOX)	12-LOX Gln/Gln genotype	OR 1.42 (1.12–1.81), p = 0.003	sex, age, smoking
				SNP in cyclooxygenase-2 (COX-2)	COX-2 -1195GA	OR 1.34 (1.08–1.68), p = 0.008	age, sex, smoking
				SNP in COX-2	COX-2 -1195AA	OR 1.72 (1.35–2.20), p = < 0.001	age, sex, smoking
				SNP in COX-2	COX-2 -765GC	OR 2.24 (1.59–3.16), p < 0.001	age, sex, smoking
				SNP in both COX-2 and 12-LOX	12-LOX Gln/Gln and COX-2 – 1195AA; 12-LOX Gln/Gln and – 765GC	OR 3.21 (1.93–5.34); OR 3.33 (1.59–6.98)	age, sex, smoking
Hao et al. (2014)	Identification of genetic variants in base excision repair pathway and their associations with risk of esophageal squamous cell carcinoma	419/480 *	Beijing	SNP in base ecision repair (BER) genes that repair DNA damage	ADPRT 762Ala allele	OR 1.25 (1.02–1.53)	age, sex, smoking
					MDB4 346 Lys allele	OR 1.25 (1.02–1.53)	age, sex, smoking
					LIG3 3704G allele	OR 0.78 (0.63–0.97)	age, sex, smoking
					XRCC1-77C allele	OR 1.38 (1.01–1.89)	age, sex, smoking
Hu et al. (2012)	Putatively Functional PLCE1 Variants and Susceptibility to Esophageal Squamous Cell Carcinoma (ESCC): A Case-Control Study in Eastern Chinese Populations	1064/1221 *	Shanghai, Jiangsu, Zhejiang	SNP in PLCE1 gene	PLCE1 SNP rs2274223 GG	OR 1.49 (1.03–2.17), p = 0.037	age, sex, smoking, alcohol
					PLCE1 SNP rs11187870 CG/CC	OR 1.20 (1.00–1.44), p = 0.045	age, sex, smoking, alcohol
					PLCE1 SNP Grs2274223Crs11187870 haplotype	OR 1.22 (1.04–1.42), p = 0.016	age, sex, smoking, alcohol
Hu et al. (2005)	Allelotyping of esophageal squamous-cell carcinoma on chromosome 13 defines deletions related to family history	34 ESCC cases with family history of UGI cancer/22 ESCC cases with no family history	Shanxi	LOH in chromosome 13 and UGI cancer family history	Family history of UGI vs. no family history of UGI	28/34 (82%) vs. 12 /22 (55%) having very high or high LOH	N/A
Ji et al. (2011)	Functional SNPs in human C20orf54 gene influence susceptibility to esophageal squamous cell carcinoma	240/198	Shanxi	Frequency of SNP C20orf54 genotype	Frequency of RFT2 SNP 1172 C>A (rs3746803)	x2 = 13.10, p = 0.001	N/A
				Frequency of SNP C20orf54 genotype	Frequency of RFT2 SNP 1246A>G (rs3746802)	x2 = 7.97, p = 0.019	N/A
				SNP in C20orf54	RFT2 rs3746803 C/T+T/T	OR 0.66 (0.41-1.05) (NS)	age, sex
				SNP in C20orf54	RFT2 rs3746802 A/G +G/G	OR 0.53 (0.34-0.84)	age, sex
Jiang et al. (2014)	The impact of pri-miR-218 rs11134527 on the risk and prognosis of patients with esophageal squamous cell carcinoma	706/745	Jiangsu	SNP in miRNA	pri-miR-218 rs11134527 GG	OR 0.669 (0.480-0.932), p = 0.018	age, sex
Jin et al. (2005)	No association of the matrix metalloproteinase 1 promoter polymorphism with susceptibility to esophageal squamous cell carcinoma and gastric cardiac in northern China	234 ESCC/183 GCA/350 controls	Hebei	SNPs in MMP1 promoter	MMP1 2G/2G	OR 1.28 ( 0.78-2.09) (NS)	age, sex
					MMP1 1G/2G	OR 1.23 (0.38-2.05) (NS)	age, sex
Li et al. (2020)	PRKAA1 rs13361707 C/T polymorphism confers decreased susceptibility to esophageal cancer: A case-control study	814/961	Jiangsu	SNP in PRKAA1	PRKAA1 rs13361707 CC	OR 0.64 (0.49-0.83), p = 0.001	age, sex
					PRKAA1 rs13361707 C	OR 0.80 (0.70-0.91), p = 0.001	age, sex
Li et al. (2015)	Association of the genetic polymorphisms in XRCC6 and XRCC5 with the risk of ESCC in a high-incidence region of North China	189/189 *	Henan	SNPs in XRCC6	XRCC6 rs2267437 GC	OR 2.040 (1.323-3.147), p = 0.001	alcohol, smoking
					XRCC6 rs2267437 G	OR = 1.868 (1.230-2.836), p = 0.003	alcohol, smoking
				SNPs in XRCC5	XRCC5 rs3835 or rs16855458	NS	alcohol, smoking
				AT/CC haplotype of XRCC5	XRCC5 SNP haploytpe AT	OR 4.28 (1.40-13.05), p = 0.01	alcohol, smoking
					XRCC5 SNP haploytpe CC	OR 2.31 (1.11-4.80), p = 0.03	alcohol, smoking
Li et al. (2016)	Forkhead box A1 (FOXA1) tagging polymorphisms and esophageal cancer risk in a Chinese population: a fine-mapping study	629/686 *	Jiangsu	Forkhead-box protein A1 (FOXA1) SNPs	FOXA1 rs12894364 C > T	NS	sex, age, smoking, alcohol
					FOXA1 rs2145146 C > A	NS	sex, age, smoking, alcohol
					FOXA1 rs7144658 T > C	NS	sex, age, smoking, alcohol
Li et al. (2012)	Association between XPD gene polymorphisms and esophageal squamous cell carcinoma	400/400 *	Jiangsu	SNPs in Xeroderma pigmentosum group D (XPD)	XPD codon 751 CC	OR 1.60 (1.137-2.253), p = 0.007	NR
					XPD codon 312	NS	NR
Li et al. (2013)	Genetic variants in DNA repair pathway genes and risk of esophageal squamous cell carcinoma and gastric adenocarcinoma in a Chinese population	Shanxi: 1421/1660 *; Linxian: 521/451 *; (both also neighborhood matched)	Shanxi, Henan	DNA repair pathway genes	DNA repair pathway genes	Significantly associated with risk of ESCC, p = 6.37E-4	NR
					CHEK2 22q12 gene	Significantly associated with risk of ESCC, p = 2.00E-6	age, sex, study (combined populations of two study groups)
					CHEK2 22q12 rs738722 C, T	OR 1.34, p = 4.61E-7	age, sex, study (combined populations of two study groups)
					SMUG1, TDG, TP53, GTF2H3, FEN1, POLQ, HEL308, RAD54B, MPG, FANCE, BRCA1	Signficantly associated with risk of ESCC, p = 2.00E-6 to 0.032	NR
Li et al. (2006)	Identification of a novel polymorphism Arg290Gln of esophageal cancer related gene 1 (ECRG1) and its related risk to esophageal squamous cell carcinoma	Linxian cohort: 80; Beijing cohort: 998/1252	Beijing, Henan	SNPs in ECRG1 gene	ECRG1 290Arg/Gln + 290Gln/Gln	OR 1.23 (1.03–1.46), p < 0.05	age, sex, and pack-years smoked
Lin et al. (2017)	Genetic variants at 9p21.3 are associated with risk of esophageal squamous cell carcinoma in a Chinese population	2139/2273 *	Jiangsu	Variants in 9p21.3	rs7023329 G allele	0.84 (0.77–0.91) p = 2.95E-5	age, sex, smoking, drinking
					rs1679013 C allele	1.12 (1.01–1.24); p = 0.039	age, sex, smoking, drinking
Liu et al. (2015)	IGFBP3 polymorphisms and risk of esophageal cancer in a Chinese population	380/380 *	Jiangsu	IGF binding protein polymorphisms	IGFBP3 rs2270628 CT	OR 0.70 (0.50-0.97), p = 0.033	age, sex, smoking, drinking
					IGFBP3 rs10282088 CA	OR 0.54 (0.39-0.74), p = 0.0002	age, sex, smoking, drinking
					IGFBP3 rs10282088 CA/AA	OR 0.63, (0.47-0.85), p = 0.0025	age, sex, smoking, drinking
					IGFBP3 rs3110697 GA	OR 0.63, (0.46-0.86), p = 0.003	age, sex, smoking, drinking
					IGFBP3 rs3110697 GA/AA	OR 0.65 (0.48-0.87), p = 0.004	age, sex, smoking, drinking
Liu et al. (2014)	Association of Single Nucleotide Polymorphisms in the Prostaglandin-endoperoxide Synthase 2 (PTGS2) and Phospholipase A(2) Group IIA (PLA2G2A) Genes with Susceptibility to Esophageal Squamous Cell Carcinoma	538/269	Henan	SNPs in PTGS2 and (PLA2G2A) genes that encode enzymes	PTGS2 rs12042763 TT vs. GG	OR=1.23 (1.00- 3.04), p = 0.05	age, sex, smoking
				SNP in PLA2G2A gene	PLA2G2A rs11677 CT vs. CC	OR 0.51 (0.29-0.85), p = 0.01	age, sex, smoking
					PLA2G2A rs11677 TT vs. CC	OR 0.51 (0.17-0.96), p = 0.03	age, sex, smoking
					PLA2G2A rs11677 CT+TT vs. CC	OR 0.52 (0.31-0.85), p = 0.01	age, sex, smoking
					PLA2G2A rs2236771 GC vs. GG	OR 0.55 (0.33-0.93), p = 0.03	age, sex, smoking
					PLA2G2A rs2236771 CC vs. GG	OR 0.38 (0.16-0.94), p = 0.04	age, sex, smoking
					PLA2G2A rs2236771 GC+CC vs. GG	OR 0.52 (0.32- 0.85), p = 0.009	age, sex, smoking
Ma et al. (2012)	Association of genetic polymorphisms in MDM2, PTEN and P53 with risk of esophageal squamous cell carcinoma	226/226 *	Henan	SNP in p53	P53 Arg72Pro Arg/Pro	OR 1.74 (1.05–2.89), p = 0.032	age, smoking, drinking, other genotypes
					P53 Arg72Pro Pro/Pro	OR 2.06 (1.17–3.62), p = 0.012	age, smoking, drinking, other genotypes
				SNP in MDM2	MDM2 T309G or DEL1518 all genotypes	NS	age, smoking, drinking, other genotypes
				SNP in PTEN	PTEN rs2735343 CG vs. CC	OR 2.76 (1.58–4.82), p = 0.001	age, smoking, drinking, other genotypes
					PTEN rs2735343 GG vs. CC	OR 4.30 (2.27–8.13), p = 0.000	age, smoking, drinking, other genotypes
					PTEN rs701848 all genotypes	NS	age, smoking, drinking, other genotypes
				SNP in PTEN x gene interaction	PTEN rs2735343 G allele x P53 Arg72Pro Pro allele	OR 3.21 (1.79–5.78), p = 0.000	age, smoking, drinking
				SNP in PTEN x smoking interaction	PTEN rs2735343 G allele SNP x smoking	OR 2.25 (1.16–4.34), p = 0.016	age, smoking, drinking
Ma et al. (2010)	DNA polymorphism and risk of esophageal squamous cell carcinoma in a population of North Xinjiang, China	128/326 * (also ethnicity, residence matched)	Xinjiang Uygur Autonomous Region	SNPs on various genes	ERCC1, XPA, ADHB1 variants	NS	age, sex
					ALDH2 rs886205 C allele	OR 1.626 (1.158-2.284), p= 0.005	age, sex
					XPD rs50872 C allele	OR 1.482 (1.058-2.074), p = 0.022	age, sex
					MGMT rs1101689 A allele	OR 1.666 ((1.245-2.228), p= 0.001	age, sex
					MGMT rs7069143 C allele, rs3793909 C allele, rs12771882 A allele, rs551491 C allele, rs7071825 A allele	OR 0.698 (0.518-0.939), OR 0.653 (0.429-0.995), OR 0.719 (0.524-0.986), OR 0.707 (0.529-0.945), OR 0.618 (0.506-0.910)	age, sex
Ng et al. (2008)	Replication of a genome-wide case-control study of esophageal squamous cell carcinoma	All male: 300/300 (age, neighborhood matched)	Shanxi	Variants in EPHB1, PGLYRP2, PIK3C3, and SLC9A9	EPHB1 rs1515366	OR 0.92 (0.86-0.99), p(GLM) = 0.019	age, sex, neighborhood matched
					PIK3C3 rs52911	OR 0.93 (0.88-0.99), p(GLM) = 0.02	age, sex, neighborhood matched
					PGLYRP2 rs959117	OR 0.93 (0.86-1.01), p(GLM) = 0.061 (NS)	age, sex, neighborhood matched
					SLC9A9 rs956062	OR 1.03 (0.98–1.09), p (GLM) = 0.222 (NS)	age, sex, neighborhood matched
Ni et al. (2014)	Functional polymorphisms in interleukin-23 receptor and susceptibility to esophageal squamous cell carcinoma in Chinese population	684/1064 *	Jiangsu	SNP in interleukin-23 receptor (IL-23R)	IL-23R rs10889677 AC vs. AA	OR 0.85 (0.69–1.01) (NS)	age, sex, smoking, drinking, BMI
					IL-23R rs10889677 CC vs. AA	OR 0.64 (0.44–0.93)	age, sex, smoking, drinking, BMI
					IL-23R rs6682925, rs6683039, rs1884444	NS	age, sex, smoking, drinking, BMI
Pan et al. (2015)	Functional BCL-2 regulatory genetic variants contribute to susceptibility of esophageal squamous cell carcinoma	Huai'an: 588/600 *; Jinan: 540/550 *	Jiangsu	SNP in B-cell lymphoma-2 (BCL-2)	BCL-2 rs2279115 AA vs. CC	OR 0.72 (0.57–0.90), p = 0.005	age, sex, drinking, smoking
					BCL-2 rs2279115 CA vs. CC	OR 0.86 (0.73-1.02), p = 0.079 (NS)	age, sex, drinking, smoking
Peng et al. (2017)	The correlation between XIAP gene polymorphisms and esophageal squamous cell carcinoma susceptibility and prognosis in a Chinese population	170/191 *	Inner Mongolia autonomous region	SNP in XIAP gene	XIAP rs8371 TT+CT vs. CC	OR 0.474 (0.306–0.734), p < 0.001	NR
					XIAP rs9856 all genotypes	NS	NR
Sang et al. (2017)	Flap endonuclease-1 rs174538 G>A polymorphisms are associated with the risk of esophageal cancer in a Chinese population	629/686 *	Jiangsu	Flap endonuclease-1 (FEN1) polymorphisms	FEN1 rs174538 GA	OR 0.81 (0.64–1.04), p = 0.092 (NS)	age, sex, smoking, drinking
					FEN1 rs174538 GA <63 years	OR 0.63 (0.45–0.90), P = 0.010	age, sex, smoking, drinking
					FEN1 rs174538 GA+AA <63 years	OR 0.70 (0.50–0.97) p=0.034	age, sex, smoking, drinking
Sang et al. (2016)	Epiregulin rs1460008 A>G polymorphism is associated with decreased risk of esophageal squamous cell carcinoma in a Chinese population	629/686 *	Jiangsu	Epiregulin (EREG) variants	EREG rs1460008AG vs. AA	OR 0.76 (0.60-0.96), p = 0.020	age, sex, smoking, drinking
					EREG rs1460000 GG vs AA/AG	NS	age, sex, smoking, drinking
					EREG rs1460008AG/GG vs. AA	OR 0.77 (0.62-0.97) p = 0.024	age, sex, smoking, drinking
					DEC1 rs4978620 T>C, rs2269700 T>C, and rs3750505 G>A	NS	age, sex, smoking, drinking
Shao et al. (2008)	P53 gene codon 72 polymorphism and risk of esophageal squamous cell carcinoma: a case/control study in a Chinese population	673/694 * (also ethnicity matched)	Beijing	p53 polymorphism	p53 gene codon 72 Pro/Pro	OR 1.83 (1.35–2.48)	age, sex, or smoking
					p53 gene codon 72 Pro/Arg	OR 1.01 (0.78–1.30) (NS)	age, sex, or smoking
Shen et al. (2015)	Genetic variants in miR-196a2 and miR-499 are associated with susceptibility to esophageal squamous cell carcinoma in Chinese Han population	1400/2185 *	Zhejiang, Shanghai	miRNA SNPs	miR-196a2 rs11614913 CC vs. TT	OR 1.11 (1.01–1.22), p = 0.049	age, sex, smoking, drinking
					miR-196a2 rs11614913 TT/TC vs TT	OR 1.09 (1.01– 1.19), p = 0.043	age, sex, smoking, drinking
Shi et al. (2016)	The Sp1-mediaded allelic regulation of MMP13 expression by an ESCC susceptibility SNP rs2252070	Huai'an: 588/600 *; Shandong: 1000/1000 *	Jiangsu, Shandong	Metallopeptidase 13 (MMP13) SNP	MMP13 rs2252070 GA	OR 0.63 (0.54–0.74), p = 1.7E-6	age, sex, smoking, drinking
					MMP13 rs2252070 AA	OR 0.73 (0.66–0.81), p = 1.8E-6	age, sex, smoking, drinking
Song et al. (2015)	A Genetic Variant in miRNA-219-1 Is Associated with Risk of Esophageal Squamous Cell Carcinoma in Chinese Kazakhs	248/300	Xinjiang	miRNA SNPs	SNP rs107822 AA vs. GG	OR 0.365 (0.217–0.614), p = 1.429E-4	age, sex
					SNP rs107822 AA vs. GG+GA	OR 0.371 (0.238–0.577), p = 1.134E-5	age, sex
					SNP rs107822 A allele	OR 0.573 (0.441–0.744), p = 2.837E-5	unadjusted
Song et al. (2015)	A genetic variant in CHRNB3-CHRNA6 increases risk of esophageal squamous cell carcinoma in Chinese populations	Shandong: 866/1621 Guangdong: 853/860	Shandong, Guangdong	Nicotinic acetylcholine receptor CHRNB3-A6 variant	CHRNB3-A6 rs13280604 GG/AG Shandong group	OR 1.42 (1.19–1.70), p = 1.1E-4	age, sex, smoking, drinking
					CHRNB3-A6 rs13280604 GG/AG Guangdong group	OR 1.56 (1.26–1.93), p = 5.2E-5	age, sex, smoking, drinking
					CHRNB3-A6 rs13280604 GG/AG Shandong and Guangdong groups combined	OR 1.44 (1.26–1.65), p = 8.7E-8	age, sex, smoking, drinking
Su et al. (2022)	The Single Nucleotide Polymorphisms of AP1S1 are Associated with Risk of Esophageal Squamous Cell Carcinoma in Chinese Population	1043/1143 *	Jiangsu	σ1A subunit of the adaptor protein 1 (AP1S1) SNPs	AP1S1 rs77387752 TT vs. CC	OR 10.218 (1.292–80.807), p = 0.028	age, sex matched
					AP1S1 rs4729666 TC vs. CC	OR 0.751 (0.607–0.928), p = 0.008	age, sex matched
					AP1S1 rs35208462 TC vs. CC	OR 0.780 (0.632–0.964), p = 0.021	age, sex matched
Sun et al. (2013)	Interleukin 10 rs1800872 T>G polymorphism was associated with an increased risk of esophageal cancer in a chinese population	380/380 *	Jiangsu	interleukin 9 (IL9) SNP	IL10 rs1800872 TG vs. TT	OR 1.36 (1.00-1.85), p = 0.049	unadjusted
						OR 1.36 (1.00-1.85), p = 0.053	age, sex, smoking, drinking
					IL9 rs31564 G>T, IL9 rs31563 C>T, IL12A rs2243115 T>G, IL12B rs3212227 T>G, IL13 rs1800925 C>T	NS	age, sex, smoking, drinking
Sun et al. (2004)	Polymorphisms of death pathway genes FAS and FASL in esophageal squamous-cell carcinoma	588/648 *	Beijing	FAS receptor–ligand system and FAS ligand (FASL) polymorphisms	FAS –1377AA	OR 1.79 (1.29-2.48), p < 0.001	sex, age, smoking status, other genotype
					FAS -670GG	OR 1.72 (1.26-2.34), p < 0.001	sex, age, smoking status, other genotype
					FASL –844CC	OR 2.06 (1.64-2.59), p < 0.001	sex, age, smoking status, other genotype
					FAS –1377AA + FASL –844CC gene x gene interaction	OR 4.55 (2.75-7.48); p = 0.001	sex, age, smoking status, other genotype
Tang et al. (2014)	Genetic variations in MTHFR and esophageal squamous cell carcinoma susceptibility in Chinese Han population	629/686 * (also ethnicity matched)	Jiangsu	MTHFR polymorphisms	MTHFR rs1801133 TT vs. CC	OR 1.39 (1.05–1.84), p = 0.021	age, sex, smoking, drinking
					MTHFR rs4845882 AA vs. GG	OR 0.41 (0.20–0.82), p = 0.011	age, sex, smoking, drinking
					MTHFR rs4845882 AA vs. GG+AA	OR 0.41 (0.21–0.82), p = 0.012	age, sex, smoking, drinking
					MTHFR rs4846048 GG vs. AA	OR 0.26 (0.07–0.96), p = 0.044	age, sex, smoking, drinking
					MTHFR rs4846048 GG vs. AA+AG	OR 0.27 (0.07–0.99), p = 0.048	age, sex, smoking, drinking
					MTHFR rs3753584 A>G and rs9651118 T>C	NS	age, sex, smoking, drinking
Tang et al (2015)	Identification and functional characterization of JWA polymorphisms and their association with risk of gastric cancer and esophageal squamous cell carcinoma in a Chinese population	250 ESCC/ 814 * (also residential area matched)	Jiangsu	JWA gene, also termed ADP-ribosylation-like factor 6 interacting protein 5 (ARL6IP5) polymorphisms	JWA -76G GC vs. GG	OR 1.76 (1.18–2.62)	age, sex, smoking, alcohol
					JWA 723T TG vs. TT	OR 0.98 (0.72–1.33) (NS)	age, sex, smoking, alcohol
					JWA 723T GG vs. TT	OR 0.58 (0.35–0.98)	age, sex, smoking, alcohol
					Combined JWA −76G → C and 723T → G polymorphisms: vs. GG/GG: GG/TT, GC/TG, and GC/TT	OR 1.78 (1.02–3.11), OR 3.37 (1.62–7.00), OR 2.41 (1.17–5.00)	age, sex, smoking, alcohol
Wang et al. (2014)	The ALDH7A1 genetic polymorphisms contribute to development of esophageal squamous cell carcinoma	Shandong: 1000/1000 *; Jiangsu: 588/600 *; Hebei: 510 /550 *	Shandong, Jiangsu, Hebei	ADLH7A1 polymorphisms	ALDH7A1 rs13182402	OR 0.75 (0.66–0.91), p =4.8E-4	age, sex, smoking, drinking
					ALDH7A1 rs13182402 GG	OR 0.59 (0.41–0.88), P= 0.003	age, sex, smoking, drinking
Wang et al. (2015)	Common genetic variants related to vitamin D status are not associated with esophageal squamous cell carcinoma risk in China	1942/2111	Shanxi, Henan	SNPs in Vitamin D-related genes	rs2282679, rs1155563, rs7041, rs3794060, rs12800438, rs7944929, rs3829251, rs2060793, rs1993116, rs12794714, rs10400804, rs17217119	Multiple ORs (NS)	age, sex
Wang et al. (2011)	Esophageal squamous cell carcinoma and ALDH2 and ADH1B polymorphisms in Chinese females	81/162 (age matched)	Tianjin	ALDH2 and ADH1B polymorphisms	ADH2*1/*2 vs. ADH1B*2/*2	OR 1.47 (0.84-2.58)	age, smoking, drinking, vegetable, fruit
					ADH2*1/*1 vs. ADH1B*2/*2	OR 2.36 (1.14-5.79)	age, smoking, drinking, vegetable, fruit
					ADLH2*1/*2 vs ALDH2*1/*1	OR 3.24 (1.45-5.36)	age, smoking, drinking, vegetable, fruit
Wang et al.(2013)	Association of CHRNA5-A3-B4 Variation with Esophageal Squamous Cell Carcinoma Risk and Smoking Behaviors in a Chinese Population	866/952 *	Shandong	CHRNA5-A3-B variants	CHRNA5-A3-B4 rs667282 TT/TG	OR 1.32 (1.03 – 1.69), p = 0.029	age, sex, smoking, alcohol
					CHRNA5-A3-B4 rs3743073	NS	age, sex, smoking, alcohol
Wei et al. (2013)	MiR-196a2 rs11614913 T>C polymorphism and risk of esophageal cancer in a Chinese population	380/380*	Jiangsu	miRNA SNPs	miR-196a2 rs11614913 CC vs. TT/TC	OR 0.72 (0.50–1.03), p = 0.070	age, sex, smoking, alcohol
Wei et al. (2007)	Genetic variation in transforming growth factor-beta1 gene associated with increased risk of esophageal squamous cell carcinoma	507/260 *	Henan	TGF-b1 (Transforming growth factor) polymorphisms	TGF b1 869 TC vs. TT	OR 1.882 (1.212–2.923), p = 0.005	NR
					TGF b1 869 CC vs. TT	OR 2.099 (1.288–3.421), p = 0.003	NR
					TGF –509 T/869 C haplotype vs. T haplotype	OR 1.463 (1.120–1.912), p = 0.005	NR
Wu et al. (2011)	Genome-wide association study identifies three new susceptibility loci for esophageal squamous-cell carcinoma in Chinese populations	GWAS: 2031 cases/2044 controls; Beijing: 1000/1000; Guangzhou: 1034/1110; Anyang 1000/1000; Nanjing: 952/1047	Beijing, Guangdong, Henan, Jiangsu	SNPs	5q11 rs10052657	OR 0.67 (0.62–0.73)	-
					21q22 rs2014300	OR 0.70 (0.65–0.75)	-
					6p21 rs10484761	OR 1.33 (1.23–1.45)	-
					10q23 rs2274223	OR 1.34 (1.26–1.42)	-
					12q24 rs11066015	OR 1.38 (1.29–1.48)	-
					12q24 rs2074356	OR 1.56 (1.45–1.68)	-
					12q24 rs11066280	OR 1.30 (1.22–1.38)	-
					12q24 rs11066015 x smoking and drinking	OR 1.43 (1.24–1.64), p = 3.01E-60	age, sex
					12q24 rs11066015 x smoking and drinking	OR 4.09 (3.45–4.83), p = 5.35E-7	age, sex
					12q24 rs2074356 x smoking and drinking	OR 1.44 (1.26–1.64); p = 6.48E10-8	age, sex
					12q24 rs2074356 x smoking and drinking	OR 4.41 (3.70–5.25); p = 5.47E-62	age, sex
					12q24 rs11066280 x smoking and drinking	OR 1.43 (1.24–1.66), p = 1.37E-6	age, sex
					12q24 rs11066280 x smoking and drinking	OR 3.55 (3.01-4.19), p = 6.84E-51	age, sex
					Carrying 2-6 risk genotypes among rs11066015, rs2074356, rs2274223, rs10484761, rs2014300, and rs10052657	ORs range 1.27–4.60, p(trend) = 7.92E10-5	age, sex, smoking, or drinking
Wu et al. (2015)	Copy number loss of variation_91720 in PIK3CA predicts risk of esophageal squamous cell carcinoma	204/208 * (also residential area matched);48 tumor tissues obtained from ESCC patients	Chongqing	PIK3CA variant	PIK3CA Variation_91720 copy number < 2	OR 6.251 (3.130-12.428)	age, sex
Xiao et al. (2018)	MDM2 and its functional polymorphism SNP309 contribute to the development of esophageal carcinoma	360/360	Henan	MDM2 polymorphism	SNP309 rs2279744 GG vs. TT	OR 2.55 (1.66–3.89), p = 1.50E-5	unadjusted
					SNP309 rs2279744 GG vs. TT/TG	OR 2.44 (1.69–3.51) p = 1.60E-8	unadjusted
					SNP309 G allelle vs. T allelle	OR 1.56 (1.26–1.92), p = 2.81E-5	unadjusted
					SNP309 GG vs. TT	OR 2.39 (1.48–3.8), p = 3.23E-4	multivariate
Xing et al. (2002)	Polymorphisms of DNA repair genes XRCC1 and XPD and their associations with risk of esophageal squamous cell carcinoma in a Chinese population	433/524 * (also ethnicity matched)	Beijing	DNA repair genes XRCC1 and XPD	XRCC1 Arg194Trp Trp/Trp vs. Arg/Arg	OR 1.98 (1.26–3.12)	age, sex, smoking
					XRCC1 Arg194Trp Trp/Trp vs. Arg/Arg+Arg/Trp	OR 2.07 (1.34–3.20)	age, sex, smoking
					XRCC1 Arg399Gln vs. Arg/Arg or Arg/Gln	OR 0.87 (0.55–1.37) (NS)	age, sex, smoking
					XPD Asp312Asn and Lys751Gln polymorphisms	NS	age, sex, smoking
Xing et al. (2001)	Ser326Cys polymorphism in hOGG1 gene and risk of esophageal cancer in a Chinese population	201/196 *	Henan	hOGG1 gene polymorphism	h0GG1 Ser326Cys/Cys	OR 1.9 (1.3-2.6), p < 0.05	age, sex, smoking
				smoking (independent)	smoking	OR 2.6 (1.7-3.9), p < 0.05	NR
				SNP and smoking interaction	h0GG1 Ser326Cys/Cys x smoking	NS	-
Xiong et al. (2018)	Epigenetic alterations of a novel antioxidant gene SLC22A3 predispose susceptible individuals to increased risk of esophageal cancer	Henan: 133/115 * (also geographical region matched); Guangzhou: 112/100 * (also geographical region matched); post-hoc GWAS study: 496/1056	Henan, Guangdong	Variant in SLC22A3 region	rs9457930 in high-risk individuals	OR 0.508 (0.504-0.512)	NR
				SLC22A3 promoter hypermethylation	SLC22A3 promoter hypermethylation in high-risk individuals	OR per 1% increment in SLC22A3 methylation = 1.352 (1.208-1.514)	NR
					SLC22A3 promoter hypermethylation in low-risk individuals	OR per 1% increment in SLC22A3 methlyation = 1.070 (0.9364-1.223),	NR
Xu et al. (2017)	A118G Polymorphism in μ-Opioid Receptor Gene and Interactions with Smoking and Drinking on Risk of Oesophageal Squamous Cell Carcinoma	470/490 *	Jiangsu	A118G frequency	A118G A allele frequency in ESCC cases	OR 1.22 (1.08– 1.59)	age, sex, high-fat diet, waist circumference, low-fibre diet
				A118G	A118G AG+AA vs. GG	OR 1.20 (1.05–1.53), p = 0.022	age, sex, high-fat diet, waist circumference, low-fibre diet
				smoking (independent)	Always smokers vs. never smokers	OR 1.48 (1.08–2.27), p = 0.016	age, sex, high-fat diet, waist circumference, low-fibre diet, drinking
				alcohol (independent)	Always drinkers vs. never drinkers	OR 1.69 (1.10–2.18), p = 0.010	age, sex, high-fat diet, waist circumference, low-fibre diet, smoking
				A118G x smoking interaction	A118g AA or AG smokers	OR 2.57 (1.66–3.33), p < 0.001	age, sex, high-fat diet, waist circumference, low-fibre diet, smoking
				A118G x alcohol interaction	A118G AA or AG drinkers	OR 2.36 (1.47–3.25), p < 0.001	age, sex, high-fat diet, waist circumference, low-fibre diet, smoking
Xu et al. (2015)	Impact of alcohol dehydrogenase gene 4 polymorphisms on esophageal squamous cell carcinoma risk in a Chinese population	Hanzhou: 617/534 *; Jinan: 540/550 * (also residential area matched)	Zhejiang, Shandong	ADH4 and CHEK2 variants	ADH4 rs3805322 AG vs. GG Hangzhou	OR 2.20 (1.57–3.02), p < 0.001	age, sex, smoking, drinking
					ADH4 rs3805322 AG vs. GG Jinan group	OR 1.86 (1.33–2.59), p < 0.001	age, sex, smoking, drinking
					ADH4 rs3805322 AG vs. GG Combined	OR 1.13 (0.92–1.40), p = 0.248 (NS)	age, sex, smoking, drinking
					ADH4 rs3805322 AA vs. GG Hangzhou group	OR 1.18 (0.88–1.59), p = 0.276 (NS)	age, sex, smoking, drinking
					ADH4 rs3805322 AA vs. GG Jinan group	OR 1.10 (0.81–1.49), p = 0.559 (NS)	age, sex, smoking, drinking
					ADH4 rs3805322 AA vs. GG Combined	OR 2.01 (1.60–2.53), p < 0.001	age, sex, smoking, drinking
					CHEK2 rs4822983 CC+TT vs. CC Jinan group	OR 0.79 (0.61–1.01), p = 0.064 (NS)	age, sex, smoking, drinking
Yang et al. (2009)	Polymorphisms of survivin promoter are associated with risk of esophageal squamous cell carcinoma	221/268 *	Chongqing	Survivin promoter polymorphisms	Survivin promoter polymorphism -625CC vs. GG	OR = 2.404 (1.342–4.307) p= 0.003	NR
					Survivin promoter polymorphism -625 C allele vs G allele	OR 1.464 (1.125–1.905), p = 0.004	NR
					Survivin promoter -644T--625C--31C haplotype	OR 2.373 (1.449–3.888) p < 0.001	NR
					Survivin promoter -644T---625G- -31C haplotype	OR 0.687 (0.529–0.891), p = 0.004	NR
Yang et al (2020)	Association study of map3k1 snps and risk factors with susceptibility to esophageal squamous cell carcinoma in a chinese population: A case-control study	1043/1315 *	Jiangsu	SNP in Mitogen-activated protein kinases kinase kinase 1(MAP3K1)	MAP3K1 rs702689 AG	OR=1.272 (1.061–1.525), p = 0.009	age, sex, smoking, drinking
Yao et al. (2015)	The functional variant in the 3'UTR of PTPRT with the risk of esophageal squamous cell carcinoma in a Chinese population	790/749	Jiangsu	PTPRT 3’-UTR SNPs	rs2866943 CT vs. CC	OR 0.78 (1.20-1.72), p = 0.0001	age, sex, parents who smoke, drinking, family cancer history
					rs6029959 CC vs. AA	2.47 (1.05-1.32) p = 0.0001	age, sex, parents who smoke, drinking, family cancer history
Yin et al. (2014)	Uracil-DNA glycosylase (UNG) rs246079 G/A polymorphism is associated with decreased risk of esophageal cancer in a Chinese population	380/380 *	Jiangsu	SNP in uracil-DNA glycosylase (UNG)	UNG rs246079 GA vs. GG	OR 0.67 (0.49–0.91), p = 0.011	age, sex, smoking, drinking
					UNG rs246079 AA vs. GG	OR 0.79 (0.47–1.32), p = 0.360 (NS)	age, sex, smoking, drinking
					UNG rs3219218 AG and GG vs. AA	OR 0.95 (0.70–1.30), p = 0.764 (NS); OR 1.49 (0.83–2.67), p = 0.180 (NS)	age, sex, smoking, drinking
Zheng et al. (2013)	Interleukin 17A rs4711998 A>G polymorphism was associated with a decreased risk of esophageal cancer in a Chinese population	380/380 *	Jiangsu	Interleukin 1 (IL1) polymorphism	IL1B rs16944 GA vs. GG	OR 0.69 (0.49–0.99), p = 0.041	age, sex, smoking, drinking
Yin et al. (2014)	IL-15 receptor alpha rs2228059 A>C polymorphism was associated with a decreased risk of esophageal cancer in a Chinese population	380/380 *	Jiangsu	IL-15 polymorphisms	IL-15RA rs2228059 CC vs. AA+AC	OR 0.64 (0.43–0.95), p = 0.028	age, sex, smoking, drinking
					rs10519612 A>C, rs10519613 C>A, rs17007695 T>C, rs17015014 G>C, or rs35964658 A>G	Multiple ORs (NS)	age, sex, smoking, drinking
Yin et al. (2014)	TERT-CLPTM1L Rs401681 C>T polymorphism was associated with a decreased risk of esophageal cancer in a Chinese population	629/686 *	Jiangsu	TERT-CLPTM1L variants	TERT-CLPTM1L rs401681 CT vs. CC	OR 0.74 (0.58–0.94), p = 0.012	age, sex, smoking, drinking
					TERT-CLPTM1L rs401681 CT/TT vs. CC	OR 0.74 (0.59–0.93), p = 0.009	age, sex, smoking, drinking
					TERT rs2736098 GA, AA vs. GG	OR 1.01 (0.79–1.28), p = 0.970 (NS); OR 1.18 (0.82–1.71), p = 0.372 (NS)	age, sex, smoking, drinking
Yin et al. (2013)	Hsa-miR-34b/c rs4938723 T>C and hsa-miR-423 rs6505162 C>A polymorphisms are associated with the risk of esophageal cancer in a Chinese population	629/686	Jiangsu	miRNA SNPs	hsa-miR-34b/c rs4938723 CC vs TT+TC	OR 0.65 (0.44–0.97), p = 0.036	age, sex, smoking, drinking
					pri-miR-124-1 rs531564 C>G, pre-miR-125a rs12975333 G>T, hsa-miR-423 rs6505162 C>A	NS	adjusted for age, sex, smoking, alcohol
					Hsa-miR-423 rs6505162 C>A among smokers; hsa-miR-34b/c rs4938723 T>C among non-drinkers	OR 4.94(1.42–17.21), p = .012; OR = 0.57, (0.34–0.94), p = 0.029	adjusted for age, sex, smoking, alcohol
Yu et al. (2004)	Polymorphisms in the DNA repair gene XPD and susceptibility to esophageal squamous cell carcinoma	135/152 *	Hubei	XPD SNPs	XPD 751 Gln/Gln	OR 6.71 (1.90–23.73), p < 0.005	NR
Yu et al. (2022)	Contribution of ZBTB20 Polymorphisms to Esophageal Cancer Risk Among the Chinese Han Population	525/522 *	Hainan	ZBTB20 SNPs	rs10934270 T allele vs. C allele	OR 0.66 (0.47–0.93), p = 0.017	age, sex
					rs10934270 CT-TT vs. CC	OR 0.67 (0.47-0.96), p = 0.031	age, sex
					rs10934270 log-additive model	OR 0.67 (0.48–0.94), p = 0.020	age, sex
					rs9841504 GG vs. CC	OR 2.59 (1.02–6.59), p = 0.045	age, sex
					rs9841504 GG vs CC+CG	OR 2.56 (1.01–6.47), p = 0.047	age, sex
					rs9288999, rs73230612	NS	age, sex
Yun et al. (2015)	Association of polymorphisms in X-ray repair cross complementing 1 gene and risk of esophageal squamous cell carcinoma in a Chinese population	381/432 *	Henan	XRCC1 SNPs	XRCC1 −77T>C (T-77C), codon 194 (Arg194Trp), or codon 399 (Arg399Gln)	NS	age, sex, smoking, drinking, family history of cancer
					haplotype C(codon 194)G(codon 399)C(-77T>C)	OR 0.62 (0.40–0.96) , p = 0.03	age, sex, smoking, drinking, family history of cancer
Zhang et al. (2003)	Association of cyclin D1 (G870A) polymorphism with susceptibility to esophageal and gastric cardiac carcinoma in a northern Chinese population	120/183 *	Hebei	cyclin D1 SNP	cyclin D1 G870A GG vs. GA+AA	OR 0.37 (0.16 – 0.83)	age, sex
Zhang et al. (2003)	Association of NAD(P)H: quinone oxidoreductase 1 (NQO1) C609T polymorphism with esophageal squamous cell carcinoma in a German Caucasian and a northern Chinese population	193/141	Hebei	quinone oxidoreductase 1 (NQO1) SNP in Chinese	C609T TT vs. CC+CT	OR 1.81 (1.04-3.15)	sex, smoking
Zhang et a. (2008)	Association of CDH1 single nucleotide polymorphisms with susceptibility to esophageal squamous cell carcinomas and gastric cardia carcinomas	333/343	Hebei	SNPs in CDH1 gene, –160C/A and –347G/GA and +54C/T	*+54C allele CC+ CT vs. TT	OR 1.45 (1.06–1.99 )	age, sex
Zhao et al. (2009)	Cyclooxygenase-2 Gly587Arg variant is associated with differential enzymatic activity and risk of esophageal squamous-cell carcinoma	1026/1270 *	Beijing	SNP in COX-2 promoter region	1759 GA+AA vs. GG	OR 1.91 (1.39–2.62)	age, sex, pack-year smoked
Zhao et al. (2014)	FasL gene -844T/C mutation of esophageal cancer in South China and its clinical significance	248/298	Zhejiang	FasL SNP	FasL -844 CC vs. TT	OR 0.425(0.255–0.708), p = 0.001	age, sex
					FasL -844 C allele vs. T allele	OR 0.597(0.460–0.776), p = 0.000	age, sex
					FasL -844 CC + Fas -1377 GG+GA allele	OR 0.488(0.320–0.743), p = 0.001	age, sex
Zhong et al. (2011)	Frequent germline mutation in the BRCA2 gene in esophageal squamous cell carcinoma patients from a low-risk Chinese population	47/94 *	Shanghai	BRCA2 mutation	BRCA2 mutation frequency vs. controls	OR = 10.9 (2.2-52.8), p = 0.003	NR
Zhou et al. (2016)	The identification of two regulatory ESCC susceptibility genetic variants in the TERT-CLPTM1L loci	Jiangsu: 588/600; Shandong: 1000/1000; Hebei: 510/550; Hebei and Jiangsu: 66 pairs ESCC and healthy tissue	Jiangsu, Shandong, Hebei	5p15.33 TERT-CLPTM1L SNPs	TERT-CLPTM1L rs2853691 AG vs. AA	OR 1.16 (1.01-1.32), p = 0.036	age, sex, smoking, drinking
					TERT-CLPTM1L rs2853691 GG vs. AA	OR 1.32 (1.16-1.50), p = 2.2E-5	age, sex, smoking, drinking
					TERT-CLPTM1L rs2736100 TG vs. TT	OR 1.32 (1.44-1.53), p = 2.1E-4	age, sex, smoking, drinking
					TERT-CLPTM1L rs2736100 GG vs. TT	OR 1.41 (1.29-1.55), p = 4.0E-8	age, sex, smoking, drinking
					TERT-CLPTM1L rs451360 GT vs. GG	OR 0.68 (0.58-0.81), p = 6.3E-6	age, sex, smoking, drinking
					TERT-CLPTM1L rs451360 TT vs. GG	OR 0.61 (0.44-0.85), p = 0.003	age, sex, smoking, drinking
Zhou et al. (2013)	Association of a Genetic Variation in a miR-191 Binding Site in MDM4 with Risk of Esophageal Squamous Cell Carcinoma	Jinan: 540/550 *; Huai'an: 588/600 *	Shandong, Jiangsu	MDM4 SNP	MDM4 rs4245739 AC+CC vs. AA, in Jinan	OR 0.54 (0.35–0.82), p = 0.004	age, sex, smoking, drinking
					MDM4 rs4245739AC+CC vs. AA, in Huai'an	OR 0.68 (0.45–0.99), p = 0.049	age, sex, smoking, drinking
				MDM4 SNP interactions	rs4245739 x smoking interaction	p(interaction) = 0.022
					rs4245739 x drinking interaction	p(interaction) = 0.032
Zhou et al. (2016)	Association of programmed death-1 polymorphisms with the risk and prognosis of esophageal squamous cell carcinoma	584/585 *	Hebei	Programmed death-1 (PD-1) polymorphisms	PD-1 rs2227981 CT vs. CC among smokers	OR 1.483 (1.018– 2.160), p = 0.040	age, sex, UGIC fam history
					PD-1 rs2227982 CT vs. CC among females	OR 1.708 (1.056–2.762), p = 0.029	age, smoking, UGIC fam history
					PD-1 rs10204525 AA vs. GG	OR 1.735 (1.086–2.771), p = 0.021	age, sex, smoking, UGIC fam history
					PD-1 rs10204525 GG vs. AA+AG	OR 0.620 (0.393-0.979), p = 0.040	age, sex, smoking, UGIC fam history
Zhou et al. (2013)	Polymorphism of A133S and promoter hypermethylation in Ras association domain family 1A gene (RASSF1A) is associated with risk of esophageal and gastric cardia cancers in Chinese population from high incidence area in northern China	143/235	Henan	Ras association domain family 1A (RASSF1A) methylation	RASSF1A promoter methylation	OR 5.90 (2.78–12.52), p < 0.001	NR
				RASSF1A A133S polymorphism	A133S all genotypes	NS	NR
Zhu et al. (2016)	Association of the interleukin-18 receptor 1 and interleukin-18 receptor accessory protein polymorphisms with the risk of esophageal cancer	380/380 *	Jiangsu	IL-18 receptor 1 protein (IL‑18R1), IL-18 receptor accessory protein (IL‑18RAP) polymorphisms	IL‑18R1 rs13015714 G>T, IL‑18RAP rs917997 C>T, or IL‑28B rs8099917 T>G	NS	age, sex, smoking, drinking
					IL‑18R1 rs13015714 GT+TT vs. GG among males, smokers, or drinkers	OR 0.65 (0.43‑0.98), p = 0.040; OR 0.43 (0.23‑0.79), p = 0.007; OR 0.38 (0.19‑0.76; p = 0.006)	age, sex, smoking, drinking
					IL‑18RAP rs917997 TT vs. CT+CC among males, smokers, or drinkers	OR 1.58 (1.05‑2.38), p = 0.029; OR 2.36 (1.29‑4.30) p = 0.005); OR 3.01 (1.52‑5.97), p =0.002	age, sex, smoking, drinking
Zhu et al. (2015)	Associations of PI3KR1 and mTOR polymorphisms with esophageal squamous cell carcinoma risk and gene-environment interactions in Eastern Chinese populations	1116/1117 *	Shanghai	mTOR SNPs, not PIK3R1	PIK3R1 rs3730089, PIK3R1 rs3730090, mTOR rs2295080, mTOR rs1057079, mTOR rs1064261; Also when stratified by age, sex, smoking, drinking, or BMI	NS	-
					Having 1 risk genotype among PIK3R1 rs3730089 AG/AA, PIK3R1 rs3730090 CT/TT, mTOR rs2295080 GT/G G, mTOR rs1057079 CT/CC, or mTOR rs1064261 AG/GG	OR 1.34 (1.07–1.68), p = 0.012	age, sex, smoking, drinking
					Having 2 risk genotypes among PIK3R1 rs3730089 AG/AA, PIK3R1 rs3730090 CT/TT, mTOR rs2295080 GT/G G, mTOR rs1057079 CT/CC, or mTOR rs1064261 AG/GG	OR 1.42 (1.07–1.87), p = 0.014	age, sex, smoking, drinking
					Having 3 risk genotypes among PIK3R1 rs3730089 AG/AA, PIK3R1 rs3730090 CT/TT, mTOR rs2295080 GT/G G, mTOR rs1057079 CT/CC, or mTOR rs1064261 AG/GG	OR 1.29 (0.99–1.67), p = 0.058 (NS)	age, sex, smoking, drinking
					mTOR rs2295080, mTOR rs1057079, or mTOR rs1014261 among BMI < 25	OR 1.36 (1.07– 1.73), p = 0.14; OR=1.31 (1.03–1.67), p = 0.031, OR 1.39 (1.01–1.92), p = 0.043	age, sex, smoking, drinking
Zhu et al. (2015)	Genetic variation in miR-100 rs1834306 is associated with decreased risk for esophageal squamous cell carcinoma in Kazakh patients in northwest China	248/300 * (also ethnicity matched)	Xinjiang	miR-100 variant	rs1834306 CC vs. TT/TC	OR 0.495 (0.349-0.702), p =8.05E-5	age, sex, clinical features
					rs1834306 TC+CC	OR 0.665 (0.430-1.031), p = 0.067 (NS)	age, sex, clinical features
					rs1834306 TC+CC	OR 0.609 (0.48-0.78), p = 8.37E-5	age, sex, clinical features
					miR-34b/c rs4938723, miR-375 rs6715345, miR-146a rs2910164, miR-423 rs6505162 ,or miR-373 rs12983273	NS	age, sex, clinical features
Zhu et al. (2012)	Polymorphisms in the ERCC5 Gene and Risk of Esophageal Squamous Cell Carcinoma (ESCC) in Eastern Chinese Populations	1115/1117 *	Shanghai, Jiangsu	ERCC5 polymorphisms	ERCC5 rs2296147 CT vs TT	OR 0.76 (0.63–0.93), p = 0.006	age, sex,smoking, drinking, BMI
					ERCC5 rs2296147 CT+CC vs. TT	OR 0.80 (0.67–0.96), p = 0.016	age, sex,smoking, drinking, BMI
					ERCC5 rs2296147 C allele vs. T allele	OR 0.87 (0.74–1.01), p = 0.066 (NS)	age, sex,smoking, drinking, BMI
					rs2094258 or rs873601	NS	age, sex,smoking, drinking, BMI
Zhu et al. (2013)	Polymorphisms in mTORC1 genes modulate risk of esophageal squamous cell carcinoma in eastern Chinese populations	1126/1131 *	Shanghai	mTORC1 SNPs	mTOR rs1883965 GA vs. GG	OR 1.27 (1.01–1.60), p = 0.042	age, sex,smoking, drinking, BMI
					mTOR rs1883965 GA/AA vs. GG	OR 1.26 (1.01–1.58), p = 0.045	age, sex,smoking, drinking, BMI
					mTOR rs1883965 G>A and rs2536 T>C, RPTOR rs3751934 C>A, rs1062935 T>C, rs3751932 T>C and rs12602885 G>A, mLST8 rs3160 C>T and rs26865 G>A	NS	age, sex,smoking, drinking, BMI
					Combined analysis of 8 SNPs, carrying 2+ "unfavorable" genotypes	OR 1.35 (1.20–1.62), 0.002	age, sex,smoking, drinking, BMI
Huang et al. (2000)	High frequency allelic loss on chromosome 17p13.3–p11.1 in esophageal squamous cell carcinomas from a high incidence area in northern China	56 ESCC patients (34 UGI family history, 22 no fam hx)	Shaanxi	Chr. 17 allelic loss	30 microsatellite markers analyzed on Chr. 17p	>=65% allelic loss at 28/30 evaluated markers of 17p13.3-p11.2	-
					Regions with highest allelic loss found	>=80% allelic loss at Deletion region 1 (17p13.3-p13.2), deletion region 2 (17p13.2-p13.3), and deletion region 3 (13.1-p12)	-
Li et al. (2001)	Allelic loss on chromosome bands 13q11-q13 in esophageal squamous cell carcinoma	56 ESCC patients (34 with UGI family history, 22 without UGI family history)	Shaanxi	Chr. 13 allelic loss	42 microsatellite markers analysize on chr. 13q11-q13	54/56 (96%) showed LOH at one or more loci at 13q11- q13	-
					Regions with highest allelic loss found	>=76% LOH frequencies at deletion region 1 (13q12.11) (includes D13S787, D13S1243, D13S283, and D13S221); >=70% LOH frequencies at Deletion region 2 (13q12.3-q13.1) (includes D13S267, D13S220, and D13S219)	-
Lichun et al. (2004)	Frequent loss of heterozygosity on chromosome 9 in Chinese esophageal squamous cell carcinomas	34	Hong Kong	Chr. 9 LOH	LOH found by 17 markers on chr. 9	42.9%-980.0% LOH	-
					Regions with high allelic loss found	Deletion regions at 9p23-p22, 9q13-q22.3, 9q34	-
Lin et al. (2007)	Genetic polymorphisms in folate- metabolizing enzymes and risk of gastroesophageal cancers: a potential nutrient-gene interaction in cancer development	240/360 *	Beijing	Methylenetetrahydrofolate reductase (MTHFR) polymorphisms	MTHFR 677TT vs. CC	OR 6.18 (3.32–11.51)	NR
					MTHFR 677 CC	OR 1 (further information not available)	age, sex, smoking
					MTHFR 677 CT	OR 3.14 (1.94–5.08)	age, sex, smoking
					MTHFR 677 TT	OR 6.18 (3.32–11.51)	age, sex, smoking
					MTHFR 1298 CC vs. AA	OR 4.43 (1.23–16.02)	NR
Ren et al. (2009)	Serum pepsinogens and risk of gastric and oesophageal cancers in the General Population Nutrition Intervention Trial cohort	323/1050	Henan	PGI/II ratio	PGI/II ratio <=4 vs. >4	HR 1.56 (0.99 to 2.47) (NS)	age, sex, alcohol, smoking, BMI, Helicobacter pylori
					Continous and quartile modles	No increased risk	age, sex, alcohol, smoking, BMI, Helicobacter pylori
Zhang et al. (2014)	The identification of an ESCC susceptibility SNP rs920778 that regulates the expression of lncRNA HOTAIR via a novel intronic enhancer	Jinan: 1000/1000 *; Shijiazhuang 510/550 *; Huai'an 588/600 *	Shandong, Hebei, Jiangsu	SNP in Long noncoding RNA (lncRNA) HOX transcript antisense RNA (HOTAIR)	HOTAIR rs920778 TT vs. CC in Jinan group	OR 1.37 (1.11–1.69), p = 0.003	age, sex, drinking, smoking
					HOTAIR rs920778 TT vs. CC in Shijiazhuang group	OR 1.78 (1.34–2.38), p = 7.7E-4	age, sex, drinking, smoking
					HOTAIR rs920778 TT vs. CC in Huai'an group	OR 2.08 (1.51–2.85), p = 5.9E-4	age, sex, drinking, smoking
					HOTAIR rs920778 CT vs. CC in Shijiazhuang group	OR 1.56 (1.19–2.04), p = 0.001	age, sex, drinking, smoking
					HOTAIR rs920778 CT vs. CC in Huai'an group	OR 1.53 (1.17–2.00), p = 0.002	age, sex, drinking, smoking
					HOTAIR rs920778 CT vs. CC three groups pooled	OR 1.37 (1.19–1.57), p = 7.7 E-5	age, sex, drinking, smoking
					HOTAIR rs920778 TT vs. CC three groups pooled	OR 1.61 (1.39–1.87), p = 2.4E-6	age, sex, drinking, smoking
Cao et al. (2004)	Mutational Spectra of P53 in Geographically Localized Esophageal Squamous Cell Carcinoma Groups in China	Linxian: 47; Zhejiang: 45	Henan, Zhejiang	p53 mutation	Rates of p53 overexpression and point mutation in ESCC patients	51.1% (47/92 specimens) and 30.4% (29 of 92 specimens)	-
Hu et al. (2001)	Frequent inactivation of the TP53 gene in esophageal squamous cell carcinoma from a high-risk population in China	56	Shanxi	TP53 mutation	Cases with >=1 genetic alteration, tp53 mutation, allelic loss in tp53 gene, or LOH at tp53 microsatellite marker	96%, 77%, 73%, 80%	-
					Cases with >=2 genetic alteration; cases with both point mutation and intragenic allelic loss	75%, 59%	-
Hu et al. (2003)	Common genetic variants of TP53 and BRCA2 in esophageal cancer patients and healthy individuals from low and high risk areas of northern China	Shanxi: 120 ESCC patients; Beijing: 101 healtyh patients, Yangcheng: 131 healthy patients	Shanxi, Beijing	BRCA2 203G>A mutation	Frequency of 203 GG of ESCC vs. healthy patients	0.22 vs. 0.36 (high risk group), p= 0.047; 0.22 vs. 0.40 (low risk group), p = 0.010	-
Hu et al. (2000)	Identification of novel regions of allelic loss from a genomewide scan of esophageal squamous-cell carcinoma in a high-risk Chinese population	11	Shanxi	LOH	Frequencies of allelic loss on 3p, 5q, 9q, 13q	3p (89%), 5q (79%), 9p (81%), 9q (86%), 13q (95%)	-
					Frequencies of allelic loss on 4p, 4q, 8p, 8q, 11p, 11q, 17p, 17q, 18p	4p (65%), 4q (67%), 8p (52%), 8q (52%), 11p (71%), 11q (52%), 17p (69%), 17q (64%), 18p (50%).	-
Moody et al. (2021)	Mutational signatures in esophageal squamous cell carcinoma from eight countries with varying incidence	552 ESCC genomes from 8 countries	UK, Brazil, Japan, Tanzania, Kenya, Malawi, Iran, China	Mutational signatures	Evidence of mutational signature from external exposure that can explain differences in ESCC incidence	No evidence found	-
Xing et al. (1999)	Loss of heterozygosity of the Rb gene correlates with pRb protein expression and associates with p53 alteration in human esophageal cancer	56 (51 with both Rb and p53 status found)	Henan	LOH	Association between Rb and p53 alterations	p = 0.0015	-
					Rb LOH had higher freqency in tumors containing p53 alterations	p < 0.05	-
Guo et al. (2008)	Polymorphisms of the DNA repair gene xeroderma pigmentosum groups A and C and risk of esophageal squamous cell carcinoma in a population of high incidence region of North China	327/612	Henan, Anhui	SNPs in xeroderma pigmentosum group A (XPA) and XPC	XPA23 SNP A/G + G/G vs. A/A	OR 0.56 (0.45– 0.80)	age, sex
Li et al. (2008)	Association of the Polymorphisms of MTHFR C677T, VDR C352T, and MPO G463A with Risk for Esophageal Squamous Cell Dysplasia and Carcinoma	126/169	Shandong	SNPs of methylenetetrahydrofolate reductase (MTHFR) C677T, vitamin D receptor (VDR) C352T, and myeloperoxidase (MPO) G463A	MTHFR C677T TT vs. CC	OR 1.58 ( 0.79-3.16)	age, sex, education years
					VDR C352T TT vs. Tt/tt	OR 1.28 (0.45-3.61)	age, sex, education years
					MPO G463A GA/AA vs. GG	OR 0.85 (0.47-1.52)	age, sex, education years
Stolzenberg-Solomon et al. (2003)	Esophageal and Gastric Cardia Cancer Risk and Folate- and Vitamin B 12-related Polymorphisms in Linxian, China	129/398	Henan	SNP in methionine synthase reductase (MTRR)	MTRR 66AG or GG vs. AA	RR 1.59 (1.04–2.42)	age, sex, smoking, alcohol, trial, BMI
Hu et al. (1999)	Allelic loss in esophageal squamous cell carcinoma patients with and without family history of upper gastrointestinal tract cancer	23 ESCC cases with family UGI cancer history/ 23 ESCC cases without family UGI cancer history	Shanxi	LOH	LOH at 13q D13S894 marker in patients with positive family UGI cancer history	OR 13.00 (1.11–152.35), p = 0.039	-
Savage et al. (2004)	Variants of the IL8 and IL8RB Genes and Risk for Gastric Cardia Adenocarcinoma and Esophageal Squamous Cell Carcinoma	131	Henan	SNPs in IL8 interleukin	IL8, IL8RB SNPs association with ESCC	NS	age, sex, smoking, drinking, trial
Hyland et al. (2013)	Genetic variants in sex hormone metabolic pathway genes and risk of esophageal squamous cell carcinoma	1026/1452	Shanxi, Henan	Various genetic variants	SULT2B1, CYP1B1, CYP3A7, CYP3A5, SHBG CYP11A1	OR 0.81 (0.72–0.92), p = 0.0007; OR 1.45; (1.16–1.82) p = 0.001; OR 1.17 (1.03–1.32) p =0.019; OR 1.19 (1.04–1.35) p = 0.009; OR = 0.86 (0.76–0.96) p = 0.010; OR 1.45 (1.13–1.90) p =0.004	age, sex, location
				Sex hormone pathway/subpathways	Sex hormone metabolic pathway or subpathways and association with ESCC	NS	-
Ko et al. (2019)	BRCA2 loss-of-function germline mutations are associated with esophageal squamous cell carcinoma risk in Chinese	Henan: 1,935/1,168; Hong Kong: 338/890	Henan, Hong Kong	BRAC2 loss of function (LOF) mutation	BRAC2 LOF mutations in familial ESCC individuals vs. ExAC East Asians (East Asians in the non-TCGA Exome Aggregation Consortium); Prevalence	3.23% (6/186) vs. 0.21% (9/4300); OR 15.89, p = 2.48E-10	NR
					BRCA2 LOF mutation frequency in combined Henan cohort	OR 10.55, p = 0.0035	NR
					BRCA2 LOF mutation frequency in Hong Kong cohort	OR 10.64, p = 0.022	NR
Song et al. (2014)	Identification of genomic alterations in oesophageal squamous cell cancer	158/158	Guangdong	Gene mutations	Identified mutated genes in ESCC tumor samples	TP53, RB1, CDKN2A, PIK3CA, NOTCH1, NFE2L2 (previously known to be associated with tumors in ESCC), and ADAM29, FAM135B (these two are newly identified to be potentially associated with ESCC)	-
Tan et al. (2001)	Frequency of CYP2A6 gene deletion and its relation to risk of lung and esophageal cancer in the Chinese population	149/326 *	Beijing	Gene deletion	CYP2A6 polymorphism	OR 1.2 (0.7-2.1)	age, sex, smoking, pack-years smoked
Cao et al. (2020)	Association between BTLA polymorphisms and susceptibility to esophageal squamous cell carcinoma in the Chinese population	721/1208 *	Fujian, Jiangsu	BTLA polymorphism	BTLA SNPs rs2171513 G > A, rs3112270 A > G, rs1982809 G > A, rs16859629 T > C	NS	age,sex, smoking, drinking
Lin et al. (2010)	Serum thyroglobulin, a biomarker for iodine deficiency, is not associated with increased risk of upper gastrointestinal cancers in a large Chinese cohort	157 ESCC cases/ 36 subcohort ESCC cases	Henan	Iodine deficiency, measured by serum thyroglobulin (tg)	Highest quartile of serum Tg vs lowest quartile	HR 0.78 (0.47-1.31)	age, sex, family history, residence, smoking, drinking, H. pylori, pepsinongene I/II
Sung et al. (2015)	Common genetic variants in epigenetic machinery genes and risk of upper gastrointestinal cancers	1942/2111	Shanxi, Henan	Chromatin remodelling SNP	SETD1B rs2242259 C/T	OR 1.14 (1.04–1.24), p = 0.006	age, sex, study (Shanxi or Linxian), "top 5 eigenvectors"
					CBX4 rs4889898 C/A	OR 1.15 (1.05–1.27), p = 0.003	age, sex, study (Shanxi or Linxian), "top 5 eigenvectors"
					KAT5 rs1151500 C/T	OR 1.21 (1.06–1.39), p = 0.006	age, sex, study (Shanxi or Linxian), "top 5 eigenvectors"
					ZGPAT rs8957 C/A	OR 0.93 (0.84–1.02), p = 0.104 (NS)	age, sex, study (Shanxi or Linxian), "top 5 eigenvectors"
					BTD rs2455823 G/A	OR 1.14 (1.04–1.24), p = 0.005	age, sex, study (Shanxi or Linxian), "top 5 eigenvectors"
					EED rs10898459 C/T	OR 0.88 (0.81–0.96), p = 0.005	age, sex, study (Shanxi or Linxian), "top 5 eigenvectors"
					SMARCD1 rs836178 G/T	OR 0.86 (0.76–0.97), p = 0.013	age, sex, study (Shanxi or Linxian), "top 5 eigenvectors"
					POLE3 rs8177812 C/T	OR 1.17 (1.05–1.30), p = 0.005	age, sex, study (Shanxi or Linxian), "top 5 eigenvectors"
					RING1 rs213194 G/A	OR 1.18 (1.00–1.40), p = 0.051 (borderline significance)	age, sex, study (Shanxi or Linxian), "top 5 eigenvectors"
				miRNA SNP in AGO2	AGO2 rs6983924 A/G	1.16 (1.06–1.27) 0.001	age, sex, study (Shanxi or Linxian), "top 5 eigenvectors"
				DNA methylation SNP in MBD3L1	MBD3L1 rs10412487 T/C	0.88 (0.80–0.97) 0.008	age, sex, study (Shanxi or Linxian), "top 5 eigenvectors"
Zhang et al., (2014)	Equivocal association of RAD51 polymorphisms with risk of esophageal squamous cell carcinoma in a Chinese population	316/316	Henan	RAD51 polymorphisms	RAD51 rs1801320, rs4144242, rs4417527	NS	-
					RAD51 CGG haplotype	OR 2.289 (0.954-5.490) p = 0.020	drinking
Gu et al. (2014)	Vitamin D receptor gene polymorphisms and esophageal cancer risk in a Chinese population: a negative study	629/686 *	Jiangsu	SNPs in Vitamin D receptor (VDR)	VDR rs2107301 T>C, rs2228570 C>T, rs1989969 C>T and rs11568820 G>A	NS	-
				SNP in Vitamin D receptor VDR and drinking	VDR rs2107301 CC or TC+TT among drinkers	OR 2.66 (1.15–6.16), p = 0.022; OR 2.38 (1.06–5.37); p : 0.037	adjusted for age, sex, smoking, alcohol
Yin et al. (2017)	Association of ALDH3B2 gene polymorphism and risk factors with susceptibility of esophageal squamous cell carcinoma in a Chinese population: A case-control study involving 2,358 subjects	1043/1315 *	Jiangsu	SNP in ALDH3B2	ALDH3B2 rs34589365, rs3741172, rs4646823, rs78402723, rs7947978, rs866907 and rs9787887, and when stratified by age, sex, smoking, or drinking	NS	age, sex, smoking, drinking
NS = Not significant

## Sheet: S2. GxE inter.
Author	Title	# cases/ #controls (* age, sex matched)	Province	Genre of risk factor studied	Specific risk factor studied	Statistical result (95% C. I. ), p-value	Adjusted covariates
Pan et al. (2017)	Short leukocyte telomere length, alone and in combination with smoking, contributes to increased risk of gastric cancer or esophageal squamous cell carcinoma	740/774 *	Shandong	telomere length	shortest telomere length vs. longest	OR 1.56 (1.12–2.18), p = 0.009	age, sex, smoking, drinking
					short RTL x smoking interaction	OR 8.94 (6.25–12.81) p = 5.92E-33	age, sex, drinking
					short RTL x smoking x alcohol interaction	OR 16.82 (10.04–28.19), p = 8.52E-27	age, sex
Tan et al. (2005)	Significant increase in risk of gastroesophageal cancer is associated with interaction between promoter polymorphisms in thymidylate synthase and serum folate status	324/492 *	Beijing	SNP in TS, and TS x serum folate interaction	TS low expression genotype 3Rc/3Rc + 3Rc/2R + 2R/2R	OR 1.47 (1.03--2.10)	age, age, smoking, serum folate
					TS low expression genotype 3Rc/3Rc þ 3Rc/2R þ 2R/2R x low serum folate concetration interaction	OR 22.63 (10.44--49.05), p = 0.002	sex, age, smoking
Cai et al. (2006)	Dietary selenium intake, aldehyde dehydrogenase-2 and X-ray repair cross-complementing 1 genetic polymorphisms, and the risk of esophageal squamous cell carcinoma	205/394 *	Jiangsu	ALDH2, XRCC1 SNPs, and dietary selenium intake	Dietary selenium intake highest quintile (≥43.2 μg/day) vs. lowest quintile (<14.6 μg/day) intake	OR 0.48 (0.25-0.89)	age, sex, education, BMI, smoking, drinking
					ALDH2 Lys variant allele	OR 1.91 (0.96-3.80)	age, sex, education, BMI, smoking, drinking
					XRCC1 Gln variant allele	OR 1.67 (1.08-2.59)	age, sex, education, BMI, smoking, drinking
					ALDH2 Lys and XRCC1 Gln carriers, and low selenium intaken combined effect	OR 4.16 (1.14-15.12)	age, sex, education, BMI, smoking, drinking
Guo et al. (2008)	Genetic polymorphisms in cytochrome P4502E1, alcohol and aldehyde dehydrogenases and the risk of esophageal squamous cell carcinoma in Gansu Chinese males	All male: 80/480 (age matched)	Gansu	SNPs in ALDH2, ADH1B, CYP2E1, and among drinkers/nondrinkers	Heavy alcohol drinking vs. never (independent)	OR 3.20 (1.32-9.65)	NR
					Drinking alcohol with > 30 drink-years (independent)	OR 1.68 (0.96-3.21) (NS)	NR
					ALDH2*1/*2 (independent)	OR 2.89 (1.11-5.64)	NR
					ADH1B *1/*1 (independent)	OR 3.67 (1.26-8.73)	NR
					CYP2E1 c1/c1(independent)	OR 2.82 (1.23-6.55)	NR
					ALDH2*1/*2 among moderate-to-heavy drinkers	OR 8.58 (3.28-22.68)	NR
					ADH1B *1/*1 among moderate-to-heavy drinkers	OR 27.12 (8.52-70.19)	NR
					CYP2E1 *c1/*c1 among moderate-to-heavy drinkers	OR 7.64 (2.82-11.31)	NR
					ALDH2*1/*2 + ADH1B*1/*1 among moderate-to-heavy drinkers	OR 7.46 (3.28-18.32)	NR
					ALDH2*1/*2 + CYP2E1*c1/*c1 among moderate-to-heavy drinkers	OR 6.82 (1.44-9.76)	NR
Suo et al. (2019)	Alcohol Intake Interacts with Functional Genetic Polymorphisms of Aldehyde Dehydrogenase (ALDH2) and Alcohol Dehydrogenase (ADH) to Increase Esophageal Squamous Cell Cancer Risk	1190/1883 *	Jiangsu	ALDH2, ADH1B SNPs, and these in drinkers, nondrinkers, etc.	ALDH2 rs671(A) in drinkers	OR 1.98 (1.51–2.60)	age, sex, tea drinking, smoking, times of brushing teeth, wealth status, family ESCC history
					ALDH2 rs671(A) in nondrinkers	OR 1.20 (C.I. NR)	age, sex, tea drinking, smoking, times of brushing teeth, wealth status, family ESCC history
					ADH1B rs1042026 GG in drinkers	OR 0.46 (0.28-0.74)	age, sex, tea drinking, smoking, times of brushing teeth, wealth status, family ESCC history
					ADH1B rs1042026 GG in nondrinkers	NS	age, sex, tea drinking, smoking, times of brushing teeth, wealth status, family ESCC history
					Heavy alcohol drinking x ethanol oxidation rate additive and multiplicative interaction, among those with a fast ethanol oxidization rate (carrying rs1042026 (AG/GG))	synergy index 4.80 (1.82–12.68); ratio of ORs 2.93 (1.39–6.35)	age, sex, tea drinking, smoking, times of brushing teeth, wealth status, family ESCC history
Yu et al. (2011)	Interaction between XRCC1 polymorphisms and intake of long-term stored rice in the risk of esophageal squamous cell carcinoma: A case-control study	432/915	Jiangsu	SNPs XRCC1, and lifestyle diet factors	Drinking river water among men	OR 4.20 (2.90‐6.07)	age, education
					Alcohol drinking among men	OR 2.03 (1.43‐2.89)	age, education
					Drinking river water among women	OR 8.37 (5.09‐13.75)	age, education
					Consumption of long-term stored rice among women	OR 12.78 (2.69‐60.69)	age, education
					XRCC1 G28152A GA or AA vs. GG	OR 1.21 (0.93‐1.56) (NS)	age, sex, education, smoking, drinking, long-term stored rice consumption, river water consumption
					XRCC1 G28152A GA + AA vs. GG x consumption of long-term stored rice	OR 7.61(2.41-23.99)	age, sex, education, smoking, drinking, long-term stored rice consumption, river water consumption
Yu et al. (2014)	Combined effects of leukocyte telomere length, p53 polymorphism and human papillomavirus infection on esophageal squamous cell carcinoma in a Han Chinese population	308/309 *	Hebei, Henan	p53 SNPs, telomere length, and hpv16	short telomere length	OR 2.01 (1.41–2.80)	age, sex, smoking, drinking
					(p53 rs10042522 Arg/Arg +Arg/Pro) + (short telomere length) + (HPV-16) combined	OR 12.08 (5.49–26.56)	age, sex, smoking, drinking
Suo et al. (2019)	Differential Cumulative Risk of Genetic Polymorphisms in Familial and Nonfamilial Esophageal Squamous Cell Carcinoma	1249/1983 *	Jiangsu	genetic family risk scores	Higher genetic family history-related risk (GFR) score	Higher ESCC risk (data not reported)	NR
					Highest GFR score group among those with family ESCC history vs. lower GFR score	OR almost 7 (1.92-24.77) (data not reported)	NR
					Higher GFR score group among those without family ESCC history vs. lower GFR score	OR almost 2 (1.41-3.93) (data not reported)	NR
					Cumulative risk by age 75 for four subgroups: Cases with high GFR, cases with low GFR, controls with high GFR, controls with low GFR	13.3%, 10.2%, 8.2%, 5.1%	NR
Li et al. (2017)	Association of TP53 codon 72 genotype polymorphism and environmental factors with esophageal squamous cell carcinoma in the mongolian population of the Chinese region of Inner Mongolia	100/50 *	Inner Mongolia autonomous region	p53 SNPs, and among drinkers/smokers	TP53 Pro72 allele vs. Arg/Arg	OR 1.659 (1.112–2.474)	NR
					Alcohol drinking distrubution in cases vs. controls	χ2 =15.992, p < 0.001	NR
					Smoking distribution in cases vs. controls	χ2 =11.344, p = 0.001	NR
Shi et al. (2012)	Interaction between Alcohol Consumption and CYP 2C19 Gene Polymorphism in Relation to Oesophageal Squamous Cell Carcinoma	350/350 * (also geographically matched)	Yunnan	CYP2C19 SNPs x alcohol	CYP2C19*3 A Allele (AA or AG) + alcohol	OR 8.747 (6.321–18.122), p (interaction) = 0.009	age, sex, geographically matched
Cai et al. (2005)	Dietary selenium intake and genetic polymorphisms of the GSTP1 and p53 genes on the risk of esophageal squamous cell carcinoma *(primarily listed under T5. Diet)	218/415	Jiangsu	Dietary selenium and polymorphisms interaction	Selenium consumption <25.9ug/d x p53 Pro/Pro interaction	OR 3.19 (1.74-5.84)	age, sex, education, BMI, income, smoking, drinking
					Selenium consumption <25.9ug/d x GSTP1 Ile/Ile interaction	OR 1.90 (1.03-3.51)	age, sex, education, BMI, income, smoking, drinking
Zhao et al. (2022)	Association of Esophageal Squamous Cell Carcinoma With the Interaction Between Poor Oral Health and Single Nucleotide Polymorphisms in Regulating Cell Cycles and Angiogenesis: A Case-Control Study in High-Incidence Chinese *(primarily listed under T8. Oral Health)	927/1701	Jiangsu	SNPs x oral health practices	rs11187842 CT/TT x ≤1 times/day toothbrushing interaction	OR 3.45 (2.55–4.70)	age, sex
					rs11187842 CT/TT x ≥2 times/day toothbrushing interaction	OR 2.15 (1.43–3.22)
					rs3781264 CT/CC x ≤1 times/day toothbrushing interaction	OR 3.21 (2.37–4.38)
					rs3781264 CT/CC x ≥2 times/day toothbrushing interaction	OR 2.10 (1.40–3.14)
					rs994771 CT x ≤1 times/day toothbrushing interaction	OR 1.91 (1.41–2.61)
					rs994771 CT x ≥2 times/day toothbrushing interaction	OR 1.16 (0.78–1.71)
					PLCE1 rs3765524 TT x toothbrushing ≤1 times/day brushing interaction	OR 4.88 (2.95–8.13)
					PLCE1 rs3765524 TT x toothbrushing ≥2 times/day brushing interaction	OR 5.66 (2.31–13.98)
					rs753724 GT/TT x ≤1 times/day toothtoothbrushing interaction	OR 3.48 (2.56–4.75)
					rs753724 GT/TT x ≥2 times/day toothbrushing interaction	OR 2.21 (1.47–3.31)
					ADH1B rs1159918 TT x tooth loss interaction	OR 2.15 (1.26–3.86)
					CYP2E1 rs3813867 GC x tooth loss interaction	OR 1.09 (1.04–1.33)

## Sheet: S3. Family hx
Author	Title	# cases/ #controls (* age, sex matched)	Province(s)	Genre of risk factor studied	Specific risk factor studied	Statistical result (95% C. I. ), p-value	Adjusted covariates
Chen et al. (2015)	Family history of esophageal cancer increases the risk of esophageal squamous cell carcinoma	619/772 *	Jiangsu	Family history of ESCC	Family history of ESCC in first degree relative vs. no first degree relative family history of ESCC	OR 1.85 (1.42–2.41)	age, sex, family size, education, smoking, drinking, missing & filled teeth, tooth brushing frequency
					1 first degree relative has history of ESCC vs. none	OR 1.68 (1.27–2.23)	age, sex, family size, education, smoking, drinking, missing & filled teeth, tooth brushing frequency
					>=2 first degree relatives have history of ESCC vs. none	OR 2.93 (1.67–5.12)	age, sex, family size, education, smoking, drinking, missing & filled teeth, tooth brushing frequency
					Both parents having ESCC history vs. no parents having ESCC history	OR 7.96 (1.74–36.32)	age, sex, family size, education, smoking, drinking, missing & filled teeth, tooth brushing frequency
					Cumulative risk of ESCC to age 75 in first degree relatives of cases vs. controls	12.2% vs. 7.0%; HR 1.91 (1.54–2.37)	-
Yang et al. (2021)	Family History and Risk of Upper Gastrointestinal Cancer in the Linxian General Population	9443 (family history of UGI cancer)/ 20110 (no family history of UGI cancer)	Henan	Family history of upper gastronitestinal (UGI) cancer	Family history of UGI cancer vs. no family history of UGI cancer	HR 1.45 (1.35–1.56)	age, sex, smoking, drinking, education, fruit and vegetable consumption frequency
					Both parents having UGI family history vs. no parents having UGI history	HR 1.65 (1.40–1.95)	age, sex, smoking, drinking, education, fruit and vegetable consumption frequency
Nan et al. (2014)	Younger age of onset and multiple primary lesions associated with esophageal squamous cell carcinoma cases with a positive family history of the cancer suggests genetic predisposition	776/1776	Hebei	Family history of ESCC	Positive family history of ESCC age of onset vs. negative family history age of onset	51.83 years vs. 53.59 years, p < 0.01	N/A
					Positive family history percent of multiple primary cancers vs. negative family history percent of multiple primary cancers	5.50% vs. 1.70%, p < 0.01	N/A

## Sheet: S4. HPV
Author	Title	# cases/ #controls (* age, sex matched)	Province(s)	Genre of risk factor studied	Specific risk factor studied	Statistical result (95% C. I. ), p-value	Adjusted covariates
Yang et al. (2013)	Association of p53 and MDM2 polymorphisms with risk of human papillomavirus (HPV)-related esophageal squamous cell carcinoma (ESCC)	307/311*	Shanghai	SNPs in MDM2, p53, and these snps+hpvseopositivity	p53 rs1042522 Arg/Arg	OR 4.82 (2.91–7.98)	age, sex, smoking, drinking, HPV16 status
					p53 rs1042522 Arg/Pro	OR 5.06, (3.40–7.55)	age, sex, smoking, drinking, HPV16 status
					p53 rs1042522 Arg/Arg + Arg/Pro	OR 4.98 (3.46–7.17)	age, sex, smoking, drinking, HPV16 status
					MDM2 rs937283 GG	OR 0.69 (0.35–1.37) (NS)	age, sex, smoking, drinking, HPV16 status
					MDM2 rs937283 AG	OR 0.94 (0.67–1.34) (NS)	age, sex, smoking, drinking, HPV16 status
					MDM2 rs937283 GG + AG	OR 0.90 (0.65–1.26) (NS)	age, sex, smoking, drinking, HPV16 status
					p53 Arg/Arg or Arg/Pro + HPV16 seronegative	OR 5.34 (3.20-8.91), p < 0.001	age, sex, smoking, drinking
					p53 Pro/Pro + HPV16 seropositive	OR 2.01 (1.18-3.43), p = 0.011	age, sex, smoking, drinking
					p53 Arg/Arg or Arg/Pro + HPV16 seropositive	OR 9.33 (5.44–16.0), p < 0.001	age, sex, smoking, drinking
					MDM2 rs937283 GG/AG + HPV16 seronegative	OR 0.89 (0.56–1.42), p = 0.063 (NS)	age, sex, smoking, drinking
					MDM2 rs937283 GG/AG and HPV16 seropositive	OR 1.53 (0.93–2.49), p = 0.092 (NS)	age, sex, smoking, drinking
					MDM2 rs937283 AA + HPV16 seropositive	OR 1.67 (1.06-2.65), p = 0.028	age, sex, smoking, drinking
Liu et al. (2012)	Viral load of HPV 16/18 in esophageal squamous cell carcinoma in three ethnic groups living in Xinjiang Autonomous Region, China	253: Kazakh: 102; Uyghur: 59, Han: 92	Xinjiang Uygur Autonomous Region	HPV positivity rate among ESCC cases	ESCC cases with HPV positivity	Overall: 52/253; Kazakh: 19/102 cases; Uyghur: 13/59 cases,; Han: 20/92 cases	-
					ESCC cases with HPV-16	52/253 (20.6%)	-
					ESCC cases positive with both HPV 16 and HPV 18	6/253 (2.4%) cases (3 Kazakh, 2 Uyghur, 1 Han)	-
Guo et al. (2012)	Human papillomavirus infection and esophageal squamous cell carcinoma: A case-control study	300/900 *	Henan	HPV seropositivity and associations	HPV seropositivity vs. controls	93/300 (31%) vs. 61/900 (6.8%)	-
					HPV-16 seropositivity vs. controls	70/300 (23.3%) vs. 21/900 (2.3%)	-
					HPV-18 seropositivity vs. controls	2/300 (0.7%) vs. 5/900 (0.6%)	-
					HPV-58 seropositivity vs. controls	0 /300 (0%) vs. 1/900 (0.1%)	-
					HPV in esophagus tissue	OR 6.4 (4.4–9.2)	age, sex, smoking, drinking
					HPV- 16, 18, or 58	OR 10.3 (6.3–16.8)	age, sex, smoking, drinking
					Other types of HPV infection	OR 2.4 (1.4–4.2)	age, sex, smoking, drinking
					HPV-16 presence	OR 12.8 (7.6–21.7)	age, sex, smoking, drinking
					Presence of HPV-16 serum antibodies	OR 6.1 (3.7–10.0)	age, sex, smoking, drinking
He et al. (1997)	Prevalence of HPV infection in esophageal squamous cell carcinoma in Chinese patients and its relationship to the p53 gene mutation	152 (97 paraffin-saved samples, 55 freshly frozen samples)	Sichuan	Hpv and p53 mutation presence in ESCC tissues	HPV infection and association with p53 mutation	HPV infection in freshly frozen samples (10/55); p53 mutation frequency having HPV infection (1/22); low association (p < 0.05)	-
					HPV-16 or 18 presence in tumor tissues vs. tumor free distal end	32/152 (21%) vs. 0/152 (0%)	-
					Presence of p53 mutation in ESCC tissue	22/55 (the freshly frozen samples) (40%)	-
He et al. (2014)	Anti-HPV-E7 seropositivity and risk of esophageal squamous cell carcinoma in a high-risk population in China	1435/1470 *	Henan	High-risk HPV types antibodies	Presence of HPV-16 E7 antibodies	OR 3.6 (2.5–5.0)	age,smoking, drinking, family EC history, 3 types HPV
					Presence of HPV-18 E7 antibodies	OR 1.1 (0.7–1.7) (NS)	age,smoking, drinking, family EC history, 3 types HPV
					Presence of HPV-57 E7 antibodies	OR 1.3 (0.9–1.9) (NS)	age,smoking, drinking, family EC history, 3 types HPV
Qi et al. (2012)	Human papillomavirus (HPV) infection and the risk of esophageal squamous cell carcinoma	225/224 *	Hubei	HPV positivity; associations among smokers and/or drinkers	HPV positivity in cases vs. controls	138/225 (61.3%) vs. 159/224 (71%)	N/A
					HPV among non-smokers or drinkers	OR 1.14 (0.54–2.40), p = 0.737 (NS)	age, sex, smoking, drinking
					HPV among smokers	OR 2.22 (1.22–4.04), p = 0.009	age, sex, smoking, drinking
					HPV among people who smoke and drink	OR 10.31 (4.04–26.29), p < 0.001	Only reported stratification by smoking and drinking
Zhang et al (2010)	Comparison of prevalence, viral load, physical status and expression of human papillomavirus-16, -18 and -58 in esophageal and cervical cancer: A case-control study	70/60	Guangdong	High-risk HPV types	HPV-16, 18, and 58 total detection vs. controls	35/70 (50%) vs. 20/60 (30%)	-
					Differences in viral load between HPV-16, 18, and 58 types	NS	-
Zhou et al. (2003)	Detection of human papillomavirus in Chinese esophageal squamous cell carcinoma and its adjacent normal epithelium	48 ESCC tumor samples/ 23 tumor free distal end samples	Henan, Shanxi	HPV-16	HPV-16 DNA detection in ESCC vs. healthy distal end samples	31/48 (64 %) vs. 8/23 (34.7 %)	-
					mRNA expression of HPV-16 E6 by ISH in tumor vs. tumor free samples	19/31 (61%) vs. 6/23 (26%)	-
					HPV-16 E6 infection at detection by IHC at protein level in tumor vs. tumor free samples	13/48 (27.1%) vs. 1/23 (4.3%)	-
Kamangar et al. (2006)	Human papillomavirus serology and the risk of esophageal and gastric cancers: results from a cohort in a high-risk region in China	99/381 *	Henan	HPV-16, 18, or 73	HPV-16 seropositivity	12/99 (12%) vs. 29/381 (8%)	age, sex, smoking, drinking
					HPV-18 seropositivity	8/99 (8%) vs. 35/381 (9%)	-
					HPV-73 seropositivity	13/99 (13%) vs. 42/381 (11%)	-
					HPV-16 seropositivity	OR 1.6 (0.8-3.3) (NS)	-
					HPV-18 seropositivity	OR 1.0 (0.4-2.2) (NS)	age, sex, smoking, drinking
					HPV-73 seropositivity	OR 1.3 (0.6-2.5) (NS)	age, sex, smoking, drinking
Mehryar et al. (2015)	Prevalence of human papillomavirus in esophageal carcinoma in Tangshan, China	198	Hebei	HPV in ESCC tissue	Overall HPV prevalence	158/198 (79.89%)	-
					HPV-16 prevalence	80/198 (40.4%)	-
					HPV-18 prevalence	94/198 (47.47%)	-
					HPV 16 and 18	55/198 (27.8%)	-
					HPV 16 or 18	48/198 (24.2%)	-
Shen et al. (2002)	Detection of human papillomavirus in esophageal carcinoma	176	Guangdong	HPV in ESCC tissue	Overall HPV incidence rate	36/55 (65.5%) in cancerous mucosa vs. 35/55 (60%) in normal mucosa	-
					HPV-16 detection rate in ESCC vs. ESCC-free tissue	30/77 (39%) vs. 6/44 (13.6%)	-
					HPV-18 detection rate in ESCC tissue vs. ESCC free tissue	17/77 (22.1)% vs. 2/77 (2.6%)	-
					HPV-16 or 18	52/77 (54.5%)	-
					HPV-16 and 18	8/77 (10.4%)	-
					HPV-6 and 11 detection rate in ESCC tissue	15/44 (34.1%) vs. 23/44 (52.3%)	-
Si et al. (2003)	Viral load of HPV in esophageal squamous cell carcinoma	Total 319: Hong Kong: 95; Linxian: 49; Sichuan: 100; Shantou: 18; Xi'an: 57	Hong Kong, Guangdong, Shaanxi, Henan	HPV in 5 geographic areas	Overall HPV detection in all samples in all 5 areas combined	2-22.2%; Hong Kong, 9/95 (9.5%); Linxian, 1/49 (2%); Sichuan, 19/100 (19%); Shantou, 4/18 (22.2%); and Xi'an, 10/57 (17.5%)	-
					HPV-16 detection in ESCC cases	HK: 9/95 (9.5%); Linxian: 1/49 (2%); Sichuan: 18/100 (18%); Xi'an: 7/57 (12.3%); 4/18 (22.2%)	-
					HPV-18 detection in ESCC cases	HK: 1/95 (1%); Linxian: 0 (0%); Sichuan: 5/100 (5%); Xi'an: 0 (0%); 0 (0%)	-
					HPV-16 copy number range/genome among HPV-16 positive samples from all 5 areas	<=1 - 157 copies/genome; 65% had <10 copies/genome	-
					Median HPV-18 copy number	4.9/genome (HPV-18 positive in 1/95 cases in Hong Kong, 5/100 cases in Sichuan, and none in other areas tested)	-
Teng et al. (2014)	The absence of human papillomavirus in esophageal squamous cell carcinoma in East China	Total 177; Shanghai: 127; Jiangsu: 16; Anhui: 14; Zhejiang: 12; Other provinces: 7	Shanghai, Jiangsu, Anhui, Zhejiang, and other provinces	HPV in ESCC tissue	Overall HPV positive detection	6/177 (3.4%)	-
					HPV-16	2/177 (1%)	-
					HPV-11	2/177 (1%)	-
					HPV-35	2/177 (1%)	-
Ding et al. (2010)	Human papillomavirus DNA and P16INK4A expression in concurrent esophageal and gastric cardia cancers	17; Linzhou: 14; Anyang: 3	Henan	HPV-16	HPV-16 detection among ESCC cases	8/17 (47%)	-
					P16INK4A expression among HPV positive cases	2/8 (25%)	-
Si et al. (2005)	Physical status of HPV-16 in esophageal squamous cell carcinoma	35	Hong Kong, Sichuan, Henan, Shaanxi, Guangdong	HPV-16 viral integration	HPV-16 positive samples in integrative, or mixed integrative,episomal forms	(32/35) 91.4%: 5.7% (2/35 integrative), and 85.7% (30/35 mixed integrative and episomal)	-
					HPV-16 positive samples in episomal form	8.6% (3/35)	-
Gao et al. (2006)	No association between HPV infection and the neoplastic progression of esophageal squamous cell carcinoma: Result from a cross-sectional study in a high-risk region of China	4/475	Henan	HPV in ESCC cytology specimens	HPV detection in ESCC vs. healthy cases	0/4 (0%) vs. 61/475 (13%)	-
Shuyama et al. (2007)	Human papillomavirus in high- and low-risk areas of oesophageal squamous cell carcinoma in China	Total 59: Gansu: 26 Shandong: 33	Gansu, Shandong	HPV in high (Gansu) vs low-risk (Shandong) areas	HPV detection in Gansu	17/26 (65%)	-
					HPV detection in Shandong samples	2/33 (6%)	-
					HPV-16 detection in all HPV positive cases	15/19 (79%); all integrated form; viral load <1-2 copies/cell	-
					HPV-18 detection in all HPV positive cases	3/19 (16%)	-
Yang et al. (2014)	HPV seropositivity joints with susceptibility loci identified in GWASs at apoptosis associated genes to increase the risk of Esophageal Squamous Cell Carcinoma (ESCC)	313/314 *	Shanghai	HPV seropositivity and interactions	HPV seropositivity in cases vs. controls	170/313 (45.7%) vs. 136/314 (43.3%)	-
					HPV positivity	OR 1.56 (1.14-2.13)	NR
					C12orf51 rs2074356 and HPV16 seropositive	OR 1.40 (1.11-1.77), p = 0.005	age, sex, smoking, drinking
					PLEC1 rs2274223 and HPV16 seropositive	OR 1.53 (1.23-1.91), p < 0.001	age, sex, smoking, drinking
					CHK2 rs738722 and HPV16 seropositive	OR 1.223 (0.99-1.52), p = 0.068 (NS)	age, sex, smoking, drinking
					C12ord51 rs2074356 CT/TT (vs. CC) + PLCE1 rs2274223 GG/AG (vs. AA)	OR 3.31 (1.87–5.83), p = <.001	age, sex, smoking, drinking
Si et al. (2004)	Human papillomavirus infection and loss of heterozygosity in esophageal squamous cell carcinoma	Hong Kong: 28; Sichuan: 30; Linxian: 29	Hong Kong, Sichuan,Shanxi	LOH in HPV cases	LOH frequency at marker D3S1621	Linxian: 21%; Hong Kong: 73.7%, p = 0.0029; Sichuan: 63/6%, p = 0.011	-
					LOH frequency of HPV-positive cases at marker D5S82 vs. HPV-negative cases, in Hong Kong vs. Sichuan	HPV-positive LOH vs. HPV-negative LOH: Hong Kong:71% vs. 9%; Sichuan: 14% vs. 22%	-
					LOH frequency of HPV-positive cases at marker D6S497 vs. HPV-negative cases, in Hong Kong vs. Sichuan	HPV-positive LOH vs. HPV-negative LOH: Hong Kong: 67% vs. 0%; Sichuan: 14% vs. 10%	-
					LOH frequency of HPV-positive cases at marker D13S260, vs. HPV-negative cases, in Hong Kong vs. Sichuan	HPV-positive LOH vs. HPV-negative LOH: Hong Kong: 100% vs. 46%; Sichuan: 63% vs. 67%	-

## Sheet: S5. Diet
Author	Title	# cases/ #controls (* age, sex matched)	Province(s)	Genre of risk factor studied	Specific risk factor studied	Statistical result (95% C. I. ), p-value	Adjusted covariates
Cai et al. (2005)	Dietary selenium intake and genetic polymorphisms of the GSTP1 and p53 genes on the risk of esophageal squamous cell carcinoma	218/415	Jiangsu	Dietary selenium	Highest quartile of selenium intake (39.3 or more ug/d of Selenium)	OR 0.31 (0.13-0.70)	age, sex, education, BMI, income, smoking, drinking, total energy intake
				p53 polymorphisms	p53 Pro/Pro vs. Arg/Arg	OR 2.02 (1.19-3.42)	age, sex, education, BMI, income, smoking, drinking, total energy intake
				Dietary selenium x polymorphisms interaction	Selenium consumption <25.9ug/d x p53 Pro/Pro interaction	OR 3.19 (1.74-5.84)	age, sex, education, BMI, income, smoking, drinking
					Selenium consumption <25.9ug/d x GSTP1 Ile/Ile interaction	OR 1.90 (1.03-3.51)	age, sex, education, BMI, income, smoking, drinking
Chen et al. (2014)	Association of roasting meat intake with the risk of esophageal squamous cell carcinoma of Kazakh Chinese via affecting promoter methylation of p16 gene	90/60	Xinjiang	p16 methylation and roasted meat intake association	Daily roasting meat consumption	Positively associated with risk of ESCC (p < 0.01) and mean p16 promoter CpG methylation rates (p < 0.01)	-
					Mean methylation rates of CpG 11-12 and CpG 33-34-35 in ESCC vs. healthy patients	CpG 11-12: 29.4% and 37.4%; CpG 33-34-35: 16.7% and 12.4%	-
					p16 promoter methylation x daily roasting meat intake	positive association (p < 0.01)	-
Hu et al. (2022)	Dietary fatty acid patterns and risk of oesophageal squamous cell carcinoma	422/423	Fujian	n-3 long-chain polyunsaturated fatty acid pattern (n-3 LC-PUFA)	n-3 LC-PUFA highest vs. lowest tertile of fatty acid patterns	OR 0.53 (0.34-0.81)	age, sex, education, family history of cancer, marital status, occupationan, smoking, drinking, tea consumption, hot food, pickled food, hard food, fired food, and "three other FA [fatty acid] scores"
				even-chain unsaturated fatty acid pattern (UC-UFA)	EC-UFA highest vs. lowest tertile of fatty acid patterns	OR 2.07 (1.31-3.26)	age, sex, education, family history of cancer, marital status, occupationan, smoking, drinking, tea consumption, hot food, pickled food, hard food, fired food, and "three other FA [fatty acid] scores"
				medium- and long-chain SFA (MLC-SFA), and saturated fatty acid (SFA)	MLC-SFA or SFA	MLC-SFA pattern and SFA pattern were not significantly associated with ESCC	-
Huang et al. (2014)	Vitamin D3 and beta-carotene deficiency is associated with risk of esophageal squamous cell carcinoma - Results of a case-control study in China	100/200 * (also residency matched)	Jiangsu	Serum vitamin D3 (VD3) circulating levels	VD3 concentrations of cases vs. controls (μg/dL); [Median (25th–75th percentiles)]	2.43 (1.29-4.99) vs. 4.24 (2.52-6.99); t test p < 0.05	NR
				Serum Beta-carotene (BC) circulating levels	BC concentrations of cases vs. controls; [Median (25th–75th percentiles)]	4.20 (2.36-9.80) vs. 3.85 (2.63-6.21); t test p < 0.05	NR
				VD3 concentration levels and EC risk association	VD3 highest (>6.10 ug/dL) and lowest (2-3.7 ug/dL) concentration quartile levels association with EC	OR 0.13 (0.05-0.32); OR 0.14 (0.05-0.35)	-
				BC concentration levels and EC risk association	BC highest (>11.1 ug/dL) and lowest (<3.3 ug/dL) concentration quartile levels association with EC	OR 0.13 (0.05-0.33); OR 0.16 (0.06-0.42)	-
				Dietary BC consumption	Daily dietary BC consumption in cases vs. controls (μg/day/person)	3322.92 vs. 3626.83; Wilcoxon test p > 0.05	N/A
Li et al. (2022)	Dietary Inflammatory Nutrients and Esophageal Squamous Cell Carcinoma Risk: A Case-Control Study	532/532 *	Fujian	Dietary inflammatory nutrients	Dietary inflammation index (DII) quartiles Q4 vs Q1 association with ESCC; (Q1 = most anti-inflamary scores of −0.864 to 1.727; Q4 most inflammatory scires of 4.159 to 4.891)	OR 2.591 (1.690–3.971)	age, sex, education, income, occupation, smoking, drinking, tea consumption, meal eating speed, hot food
					Odds ratio per one-quartile increase	OR 1.280 (1.118–1.465)	age, sex, education, income, occupation, smoking, drinking, tea consumption, meal eating speed, hot food
Lin et al. (2014)	Consumption of salted meat and its interactions with alcohol drinking and tobacco smoking on esophageal squamous-cell carcinoma	942/942 *	Sichuan	Salted meat consumption	50 g/week salted meat consumption	OR 1.18 (1.13–1.23)	sex, age, marital status, household income, family cancer history, BMI, smoking, drinking, pickled/ preserved vegetables consumption, fresh vegetable consumption, fresh fruit intake, energy intake
					≥4 times/week salted meat consumption vs. never intake	OR 7.06 (4.07–12.23)	sex, age, marital status, household income, family cancer history, BMI, smoking, drinking, pickled/ preserved vegetables consumption, fresh vegetable consumption, fresh fruit intake, energy intake
				Salted meat, smoking, and alcohol interactions	High salted meat intake (>90.8g/week) x alcohol drinking x no smoking interaction	OR 4.62 (2.67–8.00)	sex, age, marital status, household income, family cancer history, BMI, smoking, drinking, pickled/ preserved vegetables consumption, fresh vegetable consumption, fresh fruit intake, energy intake
					High salted meat intake (>90.8g/week) x no alcohol drinking x smoking interaction	OR 2.74 (1.40–5.37)	sex, age, marital status, household income, family cancer history, BMI, smoking, drinking, pickled/ preserved vegetables consumption, fresh vegetable consumption, fresh fruit intake, energy intake
					High salted meat intake (>90.8g/week) x alcohol drinking x smoking interaction	OR 12.21 (8.28–18.02)	sex, age, marital status, household income, family cancer history, BMI, smoking, drinking, pickled/ preserved vegetables consumption, fresh vegetable consumption, fresh fruit intake, energy intake
Liu et al. (2015)	Dietary patterns and the risk of esophageal squamous cell carcinoma: A population-based case-control study in a rural population	942/942 *	Sichuan	Diet patterns	Processed food pattern (higher pattern weight from consupmtion of preserved or pickled vegetables and salted meat or eggs)	OR 2.84 (2.13-3.8)	age, sex, education, BMI, smoking, total calorie intake, family history of cancer
					Alcohol drinking pattern (higher pattern weight from consumption of beer and liquor consumption)	OR 2.69 (1.95-3.71)	age, sex, education, BMI, smoking, total calorie intake, family history of cancer
					Vegetable and fruit pattern (higher patter weight from consumption of dark-green or dark-yellow vegetables, fruits, cruciferous vegetables)	OR 0.70 (0.53-0.92)	age, sex, education, BMI, smoking, total calorie intake, family history of cancer
					Prudent pattern (higher pattern weight from consumption of tofu and dry bean-curd, wheat, rice, dry-beans, seeds and nuts, fresh eggs, red meat.	OR 0.67 (0.50-0.88)	age, sex, education, BMI, smoking, total calorie intake, family history of cancer
Sun et al. (2021)	Dietary flavonoid intake and risk of esophageal squamous cell carcinoma: A population-based case-control study	820/863 *	Sichuan	Dietary flavonoid consumption	Highest vs. lowest quartile consumptio of isoflavones	OR 0.34 (0.23-0.50)	age, sex, marital status, family cancer history, educational, BMI, smoking, drinking, calorie intake, prudent and healthy pattern scores
					Highest vs. lowest quartile consumptio of daidzein	OR 0.31 (0.21-0.45)	age, sex, marital status, family cancer history, educational, BMI, smoking, drinking, calorie intake, prudent and healthy pattern scores
					Highest vs. lowest quartile consumptio of genistein	OR 0.34 (0.23-0.50)	age, sex, marital status, family cancer history, educational, BMI, smoking, drinking, calorie intake, prudent and healthy pattern scores
					Highest vs. lowest quartile consumptio of glycitein	OR 0.32 (0.22-0.48)	age, sex, marital status, family cancer history, educational, BMI, smoking, drinking, calorie intake, prudent and healthy pattern scores
					Third quartile vs. lowest quartile consumptio of anthocyanidins	OR 0.58 (0.42-0.80)	age, sex, marital status, family cancer history, educational, BMI, smoking, drinking, calorie intake, prudent and healthy pattern scores
					Third quartile vs. lowest quartile consumptio of delphinidin	OR 0.57 (0.41-0.78)	age, sex, marital status, family cancer history, educational, BMI, smoking, drinking, calorie intake, prudent and healthy pattern scores
					Third quartile vs. lowest quartile consumptio of cyanidin	OR 0.48 (0.35-0.66)	age, sex, marital status, family cancer history, educational, BMI, smoking, drinking, calorie intake, prudent and healthy pattern scores
					Total flavonoids, flavonols, flavones, apigenin, peonidin,quercetin, myricetin, kaempferol, luteolin	NS	age, sex, marital status, family cancer history, educational, BMI, smoking, drinking, calorie intake, prudent and healthy pattern scores
Tang et al. (2022)	Dietary intake of monounsaturated and polyunsaturated fatty acids is related to the reduced risk of esophageal squamous cell carcinoma	879/892 age and sex matched	Sichuan	Dietary fatty acid consumption	Highest vs. lowest quintile consumption of monounsaturated fatty acid (MUFA)	OR 0.33 (0.21–0.51)	age, sex, BMI, family cancer history, marital status, smoking, drinking, education, , total calorie intake, prudent and healthy pattern scores
					Highest vs. lowest quintile consumption of polyunsaturated fatty acid (PUFA)	OR 0.32 (0.20–0.51)	age, sex, BMI, family cancer history, marital status, smoking, drinking, education, , total calorie intake, prudent and healthy pattern scores
					Highest vs. lowest quintile consumption of total fatty acid (TFA)	OR 0.44 (0.28–0.70)	age, sex, BMI, family cancer history, marital status, smoking, drinking, education, , total calorie intake, prudent and healthy pattern scores
					Dietary fat	NS	age, sex, BMI, family cancer history, marital status, smoking, drinking, education, , total calorie intake, prudent and healthy pattern scores
Xue et al. (2019)	Mycotoxin exposure is associated with increased risk of esophageal squamous cell carcinoma in Huaian area, China	190/380 (age, sex, residency matched)	Jiangsu	Aflatoxin B1 (AFB1) and fumonisin B1 (FB1) myxotoxin exposure	Urinary free FB1 high (≥56.92 pg/mg creatinine) vs. low ( <56.92 pg/mg creatinine) exposure	OR 3.689 (2.438–5.582), p < 0.001	NR
					AFB1-lysine High (≥1.49 pg/mg albumine) vs. low (< 1.49 pg/mg albumine) exposure	OR 2.629 (1.711–4.041) p < 0.001	NR
					High FB1 x High AFB1 exposures interaction	OR 7.070 (3.791-13.187), p < 0.001	NR
Zhao et al. (2019)	Increased risk of esophageal squamous cell carcinoma associated with frequent and long-term consumption of salted meat and salted fat	72 ESCC/72 esophagitis/72 healthy *	Sichuan	Salted meat and fat consumption	High (≥once a week) consumption of salted meat	OR 2.40 (0.55–10.43)	age, sex, family EC history, and fruit, corn, and preserved vegetable consumption
					High (≥once a week) consumption of salted fat	OR 7.37 (2.53–21.48)	age, sex, family EC history, and fruit, corn, and preserved vegetable consumption
					Long-term (≥6 months) consumption of salted meat	OR 6.87 (1.25–37.87)	age, sex, family EC history, and fruit, corn, and preserved vegetable consumption
					Long-term (≥6 months) consumption of salted fat	OR 85.45 (11.62–628.26)	age, sex, family EC history, and fruit, corn, and preserved vegetable consumption
Zhao et al. (2014)	Association between dietary behavior and esophageal squamous cell carcinoma in Yanting	72 ESCC/72 esophagitis/72 healthy *	Sichuan	Dietary behavior	Time to finish meal ≥15mins (compared to <15mins) vs controls	OR 0.46 (0.22- 0.97)	age, smoking, drinking, education, family EC history, BMI, fruit consumption
					Frequently consuming food at high temperature (compared to sometimes or never) vs controls	OR 2.48 (1.06-5.82)	age, smoking, drinking, education, family EC history, BMI, fruit consumption
					≥10mins between water boiling and drinking vs controls	OR 0.18 (0.07-0.49)	age, smoking, drinking, education, family EC history, BMI, fruit consumption
Zhao et al. (2018)	Peanut consumption associated with a reduced risk of esophageal squamous cell carcinoma: A case-control study in a high-risk area in China	222/222 *	Sichuan	Peanut consumption	Peanut intake of 1-3 times/wk	OR 0.62 (0.34–1.13)	age,sex, smoking, alcohol, education
					Peanut intake of >=4 times /wk	OR 0.31 (0.16–0.59)	age,sex, smoking, alcohol, education
Lin et al. (2019)	Tea drinking and the risk of esophageal cancer: Focus on tea type and drinking temperature	942/942 *	Sichuan	Hot tea consumption	Drinking very hot green or black tea (>65°C) vs. nondrinkers	OR 1.67 (1.25–2.24)	sex, age, BMI, family history of cancer, smoking, drinking, fresh vegetable or fruit consumption, hot fluid or food preference, salted meat consumption
				Black tea consumption	Drinking >300g/month black tea at ≤65°C	OR 1.45 (0.99–2.48)	sex, age, BMI, family history of cancer, smoking, drinking, fresh vegetable or fruit consumption, hot fluid or food preference, salted meat consumption
					Drinking ≤300g/month black tea at >65°C	OR 1.78 (1.04–2.99)	sex, age, BMI, family history of cancer, smoking, drinking, fresh vegetable or fruit consumption, hot fluid or food preference, salted meat consumption
					Drinking >300g/month black tea at >65°C	OR 2.77 (1.63–4.73)	sex, age, BMI, family history of cancer, smoking, drinking, fresh vegetable or fruit consumption, hot fluid or food preference, salted meat consumption
				Green tea	Drinking >300g/month at ≤65°C,≤300g/month at >65°C , or >300g/month black tea at >65°C of green tea	NS	sex, age, BMI, family history of cancer, smoking, drinking, fresh vegetable or fruit consumption, hot fluid or food preference, salted meat consumption
				Tea and temperature combined	Drinking >300 g/month tea leaves at >65°C vs. drinking <300 g/month tea leaves green or black tea	OR 2.84 (1.86–4.25)	sex, age, BMI, family history of cancer, smoking, drinking, fresh vegetable or fruit consumption, hot fluid or food preference, salted meat consumption
Tai et al. (2017)	Hot food and beverage consumption and the risk of esophageal squamous cell carcinoma: A case-control study in a northwest area in China	167 /167 *	Xinjiang	Hot food or drink consumption	Consumption of high temperature (>60°C) tea vs. lower temperature (<60°C)	OR 2.23 (1.45–2.90)	Adjusted but not reported what was adjusted for
					Consumption of high temperature (>60°C) water vs. lower temperature (<60°C)	OR 2.13 (1.53–2.66)	Adjusted but not reported what was adjusted for
					Consumption of high temperature (>60°C) food vs. lower temperature (<60°C)	OR 2.98 (1.89–4.12)	Adjusted but not reported what was adjusted for
Yang et al. (2018)	Very hot tea drinking increases esophageal squamous cell carcinoma risk in a high-risk area of china: A population-based case-control study	1355/1962 *	Jiangsu	Tea drinking in men	In men: ever drinking green tea vs. never tea drinking	OR 1.52 (1.24–1.85)	age, education, occupation, number of tooth brushings per day, marital status, family wealth score, BMI 10 years prior, sum of missing and filled teeth, smoking pack-years, drinking intensity, family EC history among first-degree relatives
					In men: drinking very hot green tea (<1 minute after adding boiling water) vs. never drinking green tea	OR 2.15 (1.52–3.05)	age, education, occupation, number of tooth brushings per day, marital status, family wealth score, BMI 10 years prior, sum of missing and filled teeth, smoking pack-years, drinking intensity, family EC history among first-degree relatives
					In men: Tea drinking of up to 5 L /day*years	mild protective effect (data not reported)	N/A
					In men: Tea drinking of 5 L /day*years to 25 L/day*years	"ORs sharply increased to around 2.0 from 5 L/day*years to 25 L/day*years, and leveled off thereafter" (data not reported)	N/A
					In men: ever tea drinking x ever tea drinking interaction	OR 3.15 (2.43–4.09), p(interaction) = 0.019	age, education, occupation, number of tooth brushings per day, marital status, family wealth score, BMI 10 years prior, sum of missing and filled teeth, smoking pack-years, drinking intensity, family EC history among first-degree relatives
Gao et al. (2009)	Jasmine tea consumption and upper gastrointestinal cancer in China	600/1514 (age, gender, residential area matched)	Shanxi	Jasmine tea consumption	Overall jasmine tea consumption in combined males + females	OR 1.15 (0.92–1.44)	age, geographic regions, ever tobacco smoking, ever alcohol drinking, occupation, drinking water source, family history of esophageal or gastric cancer, ever scalding-hot food consumption
					Male lifetime consumption of 3750-24750 gram-years	OR 1.68 (1.19-2.39)	age, geographic regions, ever tobacco smoking, ever alcohol drinking, occupation, drinking water source, family history of esophageal or gastric cancer, ever scalding-hot food consumption
					Males who began drinking tea at age 27-41	OR 1.55 (1.10-2.18)	age, geographic regions, ever tobacco smoking, ever alcohol drinking, occupation, drinking water source, family history of esophageal or gastric cancer, ever scalding-hot food consumption
Wang et al. (2007)	Diet habits, alcohol drinking, tobacco smoking, green tea drinking, and the risk of esophageal squamous cell carcinoma in the Chinese population	355/408 *	Jiangsu	Diet, smoking, and alcohol	Consumption of hot temperature food in men; in women	OR 2.127 (1.394–3.245); OR 3.048 (1.733–5.364),	age, marital status, education
					Consumption of pork braised in brown sauce in men; in women	OR 2.059 (1.417–2.993); OR 1.914 (1.159–3.162)	age, marital status, education
					Consumption of old stocked rice in men	OR 9.059 (5.930–13.840); OR 14.532 (7.816–27.019)	age, marital status, education
					diet high in salt and chili, tobacco, alcohol consumption in men	OR 2.338 (1.568–3.485)	age, marital status, education
					Diet high in chili in men	OR 3.378 (2.117–5.389)	age, marital status, education
					Tobacco smoking in men	OR 1.976 (1.337–2.921)	age, marital status, education
					Alcohol drinking in men	OR 2.197 (1.510–3.195)	age, marital status, education
					Green tea drinking in women	OR 0.257 (0.070–0.941)	age, marital status, education

## Sheet: S6. H. pylori
Author	Title	# cases/ #controls (* age, sex matched)	Province(s)	Genre of risk factor studied	Specific risk factor studied	Statistical result (95% C. I. ), p-value	Adjusted covariates
Li et al. (2013)	Esophageal intraepithelial invasion of Helicobacter pylori correlates with atypical hyperplasia	196: Linzhou: 56; Shaanxi: 69; Shantou: 71	Henan, Shaanxi, Guangdong	H. pylori	H. pylori 16S rRNA positivity rate in ESCC vs. healthy samples	62.5% vs. 26.7%	N/A
Xue et al. (2013)	Serum pepsinogens and Helicobacter pylori are not associated with esophageal squamous cell carcinoma in a high-risk area in China	10 cases developed ESCC over course of 15 years among 1501 participants	Hebei	H. pylori	ESCC incidence among H. pylori seropositive vs. seronegative	No significant differences found (0.70% vs. 0.59%, p > 0.05)	N/A
					H. pylori and ESCC risk	OR 1.881 (0.462- 7.654), p = 0.378	-
				Serum pepsinogen abnormal levels	PG I ≤70 ng/ml, PG I/II ratio ≤3, or 70 ng/ml and PG I/II ratio	OR 2.549 (0.508-12.781) (NS); OR 0.317 (0.038-2.612) (NS); OR 0.377 (0.044-3.222) (NS)	N/A
Wang et al. (2006)	Etiological study of esophageal squamous cell carcinoma in an endemic region: A population-based case control study in Huaian, China *(primarily listed under T9. Multiple)	107/107 *	Jiangsu	Introverted personality, having esophageal lesions, H. pylori infection, eating fast, favoring salty or acrid food, eating fatt meat, pickled vegetables or moldy food	ORs 1.89-4.5, p <= 0.05	Univariate analysis	-
				H. pylori infection	OR 3.19 (1.11-9.15), p = 0.03	Multivariate but not specified	-

## Sheet: S7. Alc.&Smoking
Author	Title	# cases/ #controls (* age, sex matched)	Province(s)	Genre of risk factor studied	Specific risk factor studied	Statistical result (95% C. I. ), p-value	Adjusted covariates
Chen et al. (2010)	Effect of the interaction between the amount and duration of alcohol consumption and tobacco smoking on the risk of esophageal cancer: A case-control study	835/835 *	Hebei	Smoking and Alcohol	Tobacco smoking x alcohol consumption	OR 43.8 (further data not reported)	Adjusted but not reported what was adjusted for
					Tobacco smoking duration >=30 years vs. no tobacco smoking	OR 4.76 (2.86-7.94), p < 0.001	Adjusted but not reported what was adjusted for
					Alcohol consumption ≥20 years and ≥60 g vs. no alcohol consumption	OR 183.12 (49.10-682.91), p < 0.001	Adjusted but not reported what was adjusted for
Kumagai et al. (2013)	Heavy alcohol intake is a risk factor for esophageal squamous cell carcinoma among middle-aged men: A case-control and simulation study	All male: 571/1307	Hebei	Alcohol drinking	Heavy alcohol consumption (>53.3 g ethanol/day) for ≤20 years vs. no alcohol consumption	OR 1.91 (1.25‑2.92), p = 0.003	Adjusted OR but not defined what was adjusted for
					Heavy alcohol consumption (>53.3 g ethanol/day) for >20 years vs. no alcohol consumption	OR 7.25 (3.12‑16.83), p < 0.001	Adjusted OR but not defined what was adjusted for
				Family history	Relatives have history of ESCC vs. no relatives have history of ESCC	OR 2.06 (1.48-2.85), p < 0.001	Adjusted OR but not defined what was adjusted for
				Smoking	Smoking ≤20 cigarettes/day fpr >20 years	OR 1.58 (1.09-2.31), p = 0.017	Adjusted OR but not defined what was adjusted for
					Heavy smoking (>20 cigarettes/day) for ≤20 years or >20 years	NS	Adjusted OR but not defined what was adjusted for
Sun et al. (2018)	Association of alcohol consumption before a meal with the risk of gastric adenocarcinoma and esophageal squamous cell carcinoma: A case-control study	All male: 154/160 (age matched)	Shandong	Alcohol	Heavy drinking (>=1200g/yr) vs. never drinking	OR 1.79 (1.07-3.02)	Alcohol categories, smoking, BMI, special dietary habits, upper digestive diseases before ESCC diagnosis
					Drinking before a meal vs. drink and eat at same time	OR 1.76 (0.71-4.39)	Alcohol categories, smoking, BMI, special dietary habits, upper digestive diseases before ESCC diagnosis
					Drinking before mealtime among heavy drinkers (>=1200g/yr)	OR 3.61 (1.02-12.99), p < 0.05	Alcohol categories, smoking, BMI, special dietary habits, upper digestive diseases before ESCC diagnosis
					Drinking outside of mealtime vs. at mealtime	OR 6.04 (1.98-18.41), p < 0.001	Alcohol categories, smoking, BMI, special dietary habits, upper digestive diseases before ESCC diagnosis
Wu et al. (2011)	Smoking and alcohol drinking increased the risk of esophageal cancer among Chinese men but not women in a high-risk population	1520/3879 *	Jiangsu	Alcohol and smoking	Ever smoking vs. never	OR 1.57 (1.34–1.83)	age, sex, study area, past income, BMI, alcohol consumption, family cancer history
					Ever drinking vs. never	OR 1.50 (1.29–1.74).	age, sex, study area, past income, BMI, smoking pack-years, family cancer history
					Joint effect of >=40 cigarettes/day and >=500ml alcohol/week	OR 7.32 (4.58–11.7)	age, sex, study area, past income, BMI, family cancer history
					Smoking among men	OR 1.74 (1.44–2.09)	age, sex, study area, past income, BMI, alcohol consumption, family cancer history
					Drinking among men	OR 1.76 (1.48–2.09)	age, sex, study area, past income, BMI, smoking pack-years, family cancer history

## Sheet: S8. OralHealth
Author	Title	# cases/ #controls (* age, sex matched)	Province(s)	Genre of risk factor studied	Specific risk factor studied	Statistical result (95% C. I. ), p-value	Adjusted covariates
Chen et al. (2015)	Oral Microbiota and Risk for Esophageal Squamous Cell Carcinoma in a High-Risk Area of China	87/85	Jiangsu	Oral bacteria	Comparison of bacterial community makeup in ESCC vs. healthy	UniFrac distances found significant differences in 7/10 coordinates tested	age, sex, smoking, drinking, education, ESCC family history, tooth brushing times per day, consumption of fresh fruits or pickled vegetables, number of missing or filled teeth
					Carriage of various bacteria genera in ESCC vs. healthy	Significant less carriage among Megasphaera, Cardiobacterium, Corynebacterium, TG5, Acholeplasma, Moryella, Butyrivibrio, Dialister, Aggregatibacter, Atopobium, Lautropia, Actinobacillus, Bulleidia, Catonella, Filifactor, Peptococcus (all p <= 0.05)	sex, age
Abnet et al. (2001)	Prospective study of tooth loss and incident esophageal and gastric cancers in China	620	Henan	Tooth loss	Tooth loss	RR 1.3 (1.1-1.6)	age, sex, smoking, drinking
Chen et al. (2016)	Poor oral health is associated with an increased risk of esophageal squamous cell carcinoma - a population-based case-control study in China	616/770	Jiangsu	Tooth brushing and tooth loss	Had tooth loss vs. no tooth loss, after age 20	OR 1.29 (0.94–1.74) (NS)	age, sex, marital status, education, smoking, alcohol, tea drinking, pickled vegetables consumption, fresh fruit consumption, family history of ESCC, wealth score
					Lost >=6 teeth vs. no teeth lost after age 20	OR 1.48 (1.04–2.11)
					Tooth brushing <=1x/day vs. >=2x/day	OR 1.81 (1.37–2.38)
Ekheden et al. (2020)	Gastric Atrophy and its Interaction with Poor Oral Health Elevate the Risk for Esophageal Squamous Cell Carcinoma in a High-risk Region of China: a Population-based Case-control Study	1210/1978	Jiangsu	Oral health	Gastric atrophy x poor oral health additive interaction	RERI OR 1.28 (0.39-2.18)	ORs used to calculate the RERI OR were adjusted for age, sex, education, occupation, family wealth score, marital status, BMI 10 years before, first-degree relative history of EC, smoking, drinking, H. pylori
				Gastric atrophy	Gastric atrophy (serum pepsinogen 1 <55ug/L)	OR 1.61 (1.33-1.96)	age, sex, education, occupation, family wealth score, marital status, BMI 10 years before, first-degree relative history of EC, smoking, drinking, H. pylori, frequency of toothbrushing, sum of missing and filled teeth
Zhao et al. (2022)*(primarily listed under Oral Health)	Association of Esophageal Squamous Cell Carcinoma With the Interaction Between Poor Oral Health and Single Nucleotide Polymorphisms in Regulating Cell Cycles and Angiogenesis: A Case-Control Study in High-Incidence Chinese	927/1701	Jiangsu	Oral health	rs11187842 CT/TT x ≤1 times/day toothbrushing interaction	OR 3.45 (2.55–4.70)	age, sex
					rs11187842 CT/TT x ≥2 times/day toothbrushing interaction	OR 2.15 (1.43–3.22)
					rs3781264 CT/CC x ≤1 times/day toothbrushing interaction	OR 3.21 (2.37–4.38)
					rs3781264 CT/CC x ≥2 times/day toothbrushing interaction	OR 2.10 (1.40–3.14)
					rs994771 CT x ≤1 times/day toothbrushing interaction	OR 1.91 (1.41–2.61)
					rs994771 CT x ≥2 times/day toothbrushing interaction	OR 1.16 (0.78–1.71) (NS)
					PLCE1 rs3765524 TT x toothbrushing ≤1 times/day brushing interaction	OR 4.88 (2.95–8.13)
					PLCE1 rs3765524 TT x toothbrushing ≥2 times/day brushing interaction	OR 5.66 (2.31–13.98)
					rs753724 GT/TT x ≤1 times/day toothtoothbrushing interaction	OR 3.48 (2.56–4.75)
					rs753724 GT/TT x ≥2 times/day toothbrushing interaction	OR 2.21 (1.47–3.31)
					ADH1B rs1159918 TT x tooth loss interaction	OR 2.15 (1.26–3.86)
					CYP2E1 rs3813867 GC x tooth loss interaction	OR 1.09 (1.04–1.33)

## Sheet: S9. Multiple
Author	Title	# cases/ #controls (* age, sex matched)	Province(s)	Genre of risk factor studied	Specific risk factor studied	Statistical result (95% C. I. ), p-value	Adjusted covariates
Peng et al. (2015)	Independent and combined effects of environmental factors and CYP2C19 polymorphisms on the risk of esophageal squamous cell carcinoma in Fujian Province of China	285/570 * (also ethnicity, residence matched)	Fujian	CYP2C19 polymorphisms	CYP2C19*2 A allele	OR 3.19 (2.21–4.61), p < 0.001	sex, age, education, income, smoking, tea drinking, body mass index, other variables
					CYP2C19*3 all genotypes	No significant association found	sex, age, education, income, smoking, tea drinking, body mass index, other variables
					Cyp2C19*2 GA/AA x tea drinking interaction	p(interaction) = 0.042	age, sex, income, education, job, family history of ccancer in first degree relatives, marriage, other confounders
				CYP219 polymorphisms interactions	CYP2C19*2 x hot beverage and food consumption interaction	p(interaction) = 6.98E-6	age, sex, income, education, job, family history of ccancer in first degree relatives, marriage, other confounders
					additive joint effect with pickled vegetable consumption	ICR (where ICR>0 there is positive interaction): 1.96 (0.12–3.80)	-
				Various environmental factors (independent)	Smoking (independent)	2.02 (1.10 ~ 3.71)	Multivariate model suggests adjustments of all other environmental factors listed were done
					Alcohol (independent)	1.09 (0.70 ~ 1.57) (NS)	" "
					Tea drinking (independent)	0.63 (0.45 ~ 0.91)	" "
					Hot beverage or food consumption (independent)	2.95 (2.06~4.22)	" "
					Pickled vegetable consumption (independent)	1.87 (1.38~2.55)	" "
					Meat consumption of >=200g/day	0.75 (0.42 ~ 1.35) (NS)
					Fresh vegetables and fruit consumption of >=400g/day (independent)	0.20 (0.10 ~ 0.44)	" "
					Family history of ESCC in first degree relatives (independent)	1.77 (1.11 ~ 2.80)	" "
					Having a history of reflux esophagitis (independent)	2.96 (1.14 ~ 7.67)	" "
Wang et al. (2006)	Etiological study of esophageal squamous cell carcinoma in an endemic region: A population-based case control study in Huaian, China	107/107 *	Jiangsu	Diet and environmental risk factors	Introverted personality, having esophageal lesions, H. pylori infection, eating fast, favoring salty or acrid food, eating fatty meat, pickled vegetables or moldy food	ORs 1.89-4.5, p <= 0.05	Univariate analysis
					Regular food storage utensil clean up, green tea drinking, and alcohol abstinence	ORs 0.13-0.27, p <0.01	Univariate analysis
					Having esophageal lesion(s)	OR 11.63 (1.13–119.33), p = 0.04	Multivariate but not specified
					Fast eating	OR 3.39 (1.15-9.95), p = 0.03	Multivariate but not specified
					Family history of cancer	OR 3.83 (1.13-12.97), p = 0.03	Multivariate but not specified
					H. pylori infection	OR 3.19 (1.11-9.15), p = 0.03	Multivariate but not specified
					Regular food storage utensil clean up	OR 0.11 (0.02-0.49), p < 0.01	Multivariate but not specified
					Green tea drinking	OR 0.13 (0.03-0.62), p = 0.01	Multivariate but not specified
					GSTT1	OR 1.68 (0.96 to 2.97), p = 0.07 (NS)	NR
				SNP	Polymorphisms of CYP1A1, CYP1B1, CYP2A6, CYP2E1, GSTM1, GSTP1, EPHX	NS	NR
				Interactions	Gene-gene and gene-environment interactions	NS	NR
Gao et al. (2011)	Risk factors for esophageal and gastric cancers in Shanxi Province, China: A case-control study	600/1514 *	Shanxi	Smoking or drinking	Among males: cumulative tobacco exposure of 40-157 pack-years vs. never smoking	OR 1.51 (1.01–2.24)	age, geographic region
				Diet	Daily consumption of scalding hot food vs. never	OR 2.74 (2.06–3.65)	age, sex, geographic region
					Fresh fruit consumption of >=189 times/year	OR 0.53 (0.40-0.71)	age, sex, geographic region
					Fresh vegetable consumption of >=1230 times/year	OR 0.46 (0.35–0.62)	age, sex, geographic region
					>weekly consumption of red meat vs. monthly/seldom/never	OR 1.37 (1.03–1.82)	age, sex, geographic region
					Seldom consuming chicken vs. never	OR 1.37 (1.03–1.82)	age, sex, geographic region
					daily consumption of fish vs. never	OR 0.50 (0.28–0.88)	age, sex, geographic region
					conusming milk/dairy products vs. never	OR 1.56 (1.27–1.92)	age, sex, geographic region
					Consuming moldy food vs. never	OR 1.55 (1.27–1.89)	age, sex, geographic region
					Consuming vinegar daily	OR 0.75 (0.59–0.96)	age, sex, geographic region
				Socioeconomic status	Education of 6-9 years	OR 0.75 (0.60–0.94)	age, sex, geographic region
					Household size >=4 vs. 0-3	OR 1.29 (1.06–1.58)	age, sex, geographic region
					Having own refrigerator for >=8 years vs. not having one	OR 0.62 (0.46–0.84)	age, sex, geographic region
Tran et al. (2004)	Prospective study of risk factors for esophageal and gastric cancers in the Linxian General Population Trial cohort in China	1958	Henan	Demographic and lifestyle factors, and family history of ESCC	Age (10 year periods)	RR 1.64 (1.55–1.72)	sex
					Family history of ESCC or GCC	RR 1.42 (1.29-1.56)	age, sex
					Height >=1.64m	RR 1.28 (1.08-1.52)	age, sex
					Being born in Linxian	RR 2.10 (1.50-2.94)	age, sex
					In men: ever smoking cigarettes, pipes vs. nonsmokers	RR: 1.34 (1.16-1.54); RR 1.31 (1.13-1.53); RR 1.33 (1.15-1.53);	age
					Current cigarette smoker	RR 1.32 (1.15-1.51)	age, sex
					BMI (Q3 22kg/m2	RR 0.80 (0.71–0.91)	age, sex
					Education (completed primary)	RR 0.78 (0.64-0.94)	age, sex
					Piped water in the home	RR 0.86 (0.78-0.96)	age, sex
					High meat consumption (>12 times/year)	RR 0.73 (0.62–0.86)	age, sex
					High egg consumption (>36 eggs/year)	RR 0.85 (0.75–0.97)	age, sex
					High fresh fruit consumption (>13 times/year)	RR 0.80, (0.70–0.91	age, sex
					Consumption of fresh vegetables, pickled vegetables, moldy vegetables, persimmon bread, foods cooked in oil, hot liquids, or alcohol	NS	age, sex
Yu et al. (2010)	Comparison of lifestyle and living environment among high risk immigrant and low risk host residents: implications for esophageal cancer etiology	1791 Immigrant residents from high-risk ESCC area in Henan/1364 host residents from Caihu	Hubei	Diet, smoking	Immigrant residents (IR) consumption amount of hot food or pickled vegetables vs. host residents (HR)	Higher consumption (p < 0.05)	N/A
					IR consumption amount of fresh fruits and vegetables, and alcohol, vs. HR	Lower consumption (p < 0.05)	N/A
					IR differences in cigarette smoking or income vs. HR	No differences reported	N/A
				Living environment	Number of IR having a kitchen vs. HR	Fewer residents (p < 0.05)	N/A
Song et al. (2014)	Dinner-to-bed time and post-dinner walk: New potential independent factors in esophageal cancer development	232/286 *	Shandong	Lifestyle, diet, smoking, or drinking	Dinner to bedtime period <3 hours vs. ≥4 hours	OR 2.36 (1.35–4.13)	Dinner-to-bed time, post-dinner walk, smoking, drinking, dietary habits, reflux symptoms
					post dinner walk	OR 0.65 (0.41–1.01) (NS)	Dinner-to-bed time, post-dinner walk, smoking, drinking, dietary habits, reflux symptoms
					Smoking	OR 1.95 (1.15–3.32)	Dinner-to-bed time, post-dinner walk, smoking, drinking, dietary habits, reflux symptoms
					Drinking	OR 5.01 (2.81–8.90)	Dinner-to-bed time, post-dinner walk, smoking, drinking, dietary habits, reflux symptoms
					Daily consumption of scalding hot food, moldy food, fried food or pickled vegetables vs. normal diet	OR 4.00 (2.55–6.27)	Dinner-to-bed time, post-dinner walk, smoking, drinking, dietary habits, reflux symptoms

## Sheet: S10. Other
Author	Title	# cases/ #controls (* age, sex matched)	Province(s)	Genre of risk factor studied	Specific risk factor studied	Statistical result (95% C. I. ), p-value	Adjusted covariates
Murphy et al. (2015)	Prospective study of serum cysteine levels and oesophageal and gastric cancers in China	498/947 *	Henan	Serum cysteine	Highest quartile of serum cysteine vs. lowest	HR 0.70 (0.51-0.98)	age, sex, smoking, drinking, BMI, serum creatinine, serum creatinine squared
Gao et al. (2018)	Socioeconomic status is inversely associated with esophageal squamous cell carcinoma risk: Results from a population-based case-control study in China	1298/1900*	Jiangsu	Socioeconomic status	Higher education (secondary high school or above vs. illiteracy)	OR 0.60 (0.41-0.87)	age, sex, place of residence, marital status, family history of ESCC among first degree relatives, smoking, drinking, tea drinking, BMI of 10 years ago, sum of missing and filled teeth, daily brushing teeth frequency, total wealth score
					larger house area per person (>70 vs. <45 square meters)	OR 0.71 (0.59-0.86)	age, sex, place of residence, marital status, family history of ESCC among first degree relatives, smoking, drinking, tea drinking, BMI of 10 years ago, sum of missing and filled teeth, daily brushing teeth frequency, education
					Higher wealth score (5th quintile (high) vs. 1st quintile (low)	OR 0.43 (0.32-0.57)	age, sex, place of residence, marital status, family history of ESCC among first degree relatives, smoking, drinking, tea drinking, BMI of 10 years ago, sum of missing and filled teeth, daily brushing teeth frequency, education
					Physical labor (very active vs. sedentary)	OR 1.69 (1.27-2.26)	age, sex, place of residence, marital status, family history of ESCC among first degree relatives, smoking, drinking, tea drinking, BMI of 10 years ago, sum of missing and filled teeth, daily brushing teeth frequency, education
					larger families (≥6 vs. <3 per household)	OR 1.63 (1.30-2.03)	age, sex, place of residence, marital status, family history of ESCC among first degree relatives, smoking, drinking, tea drinking, BMI of 10 years ago, sum of missing and filled teeth, daily brushing teeth frequency, education
Chen et al. (2017)	Sitting time and occupational and recreational physical activity in relation to the risk of esophageal squamous cell Carcinoma	543/543 *	Shandong	Lifestyle factors	Longer total sitting time	OR 2.56 (1.59–4.12)	Occupational activity time, recreational activity time, smoking, drinking, dietary, BMI
					Longer occupational activity time	OR 2.90 (2.11–4.00)	Sitting time, recreational activity time, smoking, drinking, dietary, BMI
					Longer recreational activity time	OR 0.27 (0.19–0.38)	Sitting time, occupational activity time, smoking, drinking, dietary, BMI
Yang et al. (2019)	Adult height, body mass index change, and body shape change in relation to esophageal squamous cell carcinoma risk: A population-based case-control study in China	1414/1989 *	Jiangsu	Height	Height in men per 5cm increment	OR 1.53 (1.42-1.66)	age, sex, marital status, occupation, education, family wealth score, missing and filled teeth sum, tooth brushing frequency, tea temperature, smoking pack-years, alcohol drinking intensity, ESCC family history in first-degree relatives
					Height in women per 5cm increment	OR 1.90 (1.66-2.17)	" "
				BMI	BMI 10 years prior per increase of 5 kg/m2	OR 0.73 (0.64‐0.82)	" "
					BMI change from 20 years of age to 10 years prior (kg/m2)	OR 0.92 (0.89-0.94)	" "
				Body shape	Body shape 3 at 20 years old -> Body shape 1 at 10 years prior to ESCC	OR 3.68 (1.19-11.32)	" "
Zhang et al. (2012)	Association of nitrogen compounds in drinking water with incidence of esophageal squamous cell carcinoma in Shexian, China	661/54055	Hebei	nitrogen in drinking water or elevation	Nitrate nitrogen	OR 46.29, (3.16-667.39), p = 0.01	NR
					Nitrite nitrogen, ammonia nitrogen, or elevation	NS	NR
Lian et al. (2019)	Association of wheat chaff derived silica fiber and esophageal cancer in north China	3/3	Shanxi	Silica (silicon dioxide)	Phytoliths (biogenic silica) in ESCC tissue	2 phytoliths found in 1 ESCC tissue sample; reported as having similar shape to wheat bract.	N/A
					Silicon concentration in tumor tissue	High silicon concentration found in tumor tissue; not found in distant healthy tissue.	N/A
Lian et al. (2019)	A possible role of biogenic silica in esophageal cancer in North China?	2	NR	Silica (silicon dioxide)	Phytoliths (biogenic silica) in ESCC tissue	2 phytoliths found in 1 ESCC tissue sample; reported as having similar shape to prickle hair on wheat bract	N/A
Zhao et al. (2020)	Urinary exposure of N-nitrosamines and associated risk of esophageal cancer in a high incidence area in China.	73/115	Qinghai, Jiangsu	Nitrosamines	N-nitrosomethylethylamine (NMEA) exposure for second tertile (ages 60-66, BMI 22.5-25.4kg/m2) vs. first tertile (ages <60, BMI <22.5 km/m2)	OR 2.97 (1.11–7.93), p = 0.03	age, sex, BMI, smoking, drinking
					NMEA exposure for third tertile (ages >66, BMI >25.4 kg/m2) vs. first tertile (ages <60, BMI <22.5 km/m2)	OR 3.01 (1.12–8.07), p = 0.03	age, sex, BMI, smoking, drinking
					N-nitrosopyrrolidine (NPYR) exposure for third tertile (ages >66, BMI >25.4 kg/m2) vs. first tertile (ages <60, BMI <22.5 km/m2)	OR 5.31 (1.98–14.25), p < 0.01	age, sex, BMI, smoking, drinking
					N-nitrosodibutylamine (NDBA) exposure for third tertile (ages >66, BMI >25.4 kg/m2) vs. first tertile (ages <60, BMI <22.5 km/m2)	OR 2.67 (1.07–6.64), p = 0.04	age, sex, BMI, smoking, drinking
Wang et al. (1999)	Esophageal squamous cell carcinomas arising in patients from a high-risk area of North China lack an association with Epstein-Barr virus	51 ESCC tissue/16 dysplastic tissues/42 healthy tissues	Henan	Epstein-Barr Virus	EBV presence in ESCC tissues	All ESCC cases negative for hybridization signal and negative for PCR	N/A
Lam et al. (2013)	Prediagnostic plasma vitamin C and risk of gastric adenocarcinoma and esophageal squamous cell carcinoma in a Chinese population1	618/948 (subcohort, not control) *	Henan	Vitamin C	Plasma vitamin C	NS	N/A
Zhang et al. (2022)	Comparison of tumor-associated and nontumor-associated esophageal mucosa microbiota in patients with esophageal squamous cell carcinoma	All male: 31 pairs tumor and healthy adjancent tissues	Hunan	bacteria changes during ECC development but not pylori	Lactobacillus relative abundance in ESCC vs. adjacent healthy tissue	1.98 fold higher	N/A
					Fusobacterium relative abundance in ESCC vs. adjacent healthy tissue	4.35 fold higher	N/A
